# Supplementary material for: Transcriptomic analysis and physiological characteristics of exogenous naphthylacetic acid application to regulate the healing process of oriental melon grafted onto squash
Source: PeerJ. 2022 Sep 15;10:e13980. doi: 10.7717/peerj.13980 (PMC9482769; doi:10.7717/peerj.13980)
Supplement: Supplemental Information 2 [file peerj-10-13980-s002.xlsx]

## Sheet: Sheet1
#ID	gene_name	CK-IL--1_FPKM	CK-IL-2_FPKM	CK-IL-3_FPKM	CK-CA-1_FPKM	CK-CA-2_FPKM	CK-CA-3_FPKM	CK-VB-1_FPKM	CK-VB-2_FPKM	CK-VB-3_FPKM	NAA-IL-1_FPKM	NAA-IL-2_FPKM	NAA-IL-3_FPKM	NAA-CA-1_FPKM	NAA-CA-2_FPKM	NAA-CA-3_FPKM	NAA-VB-1_FPKM	NAA-VB-2_FPKM	NAA-VB-3_FPKM	CK-IL--1_CK-IL-2_CK-IL-3_vs_NAA-IL-1_NAA-IL-2_NAA-IL-3_DESeq2_FDR	CK-IL--1_CK-IL-2_CK-IL-3_vs_NAA-IL-1_NAA-IL-2_NAA-IL-3_DESeq2_log2FC	CK-IL--1_CK-IL-2_CK-IL-3_vs_NAA-IL-1_NAA-IL-2_NAA-IL-3_DESeq2_(FDR_0.01_FC_2)_regulated	CK-CA-1_CK-CA-2_CK-CA-3_vs_NAA-CA-1_NAA-CA-2_NAA-CA-3_DESeq2_FDR	CK-CA-1_CK-CA-2_CK-CA-3_vs_NAA-CA-1_NAA-CA-2_NAA-CA-3_DESeq2_log2FC	CK-CA-1_CK-CA-2_CK-CA-3_vs_NAA-CA-1_NAA-CA-2_NAA-CA-3_DESeq2_(FDR_0.01_FC_2)_regulated	CK-VB-1_CK-VB-2_CK-VB-3_vs_NAA-VB-1_NAA-VB-2_NAA-VB-3_DESeq2_FDR	CK-VB-1_CK-VB-2_CK-VB-3_vs_NAA-VB-1_NAA-VB-2_NAA-VB-3_DESeq2_log2FC	CK-VB-1_CK-VB-2_CK-VB-3_vs_NAA-VB-1_NAA-VB-2_NAA-VB-3_DESeq2_(FDR_0.01_FC_2)_regulated
MELO3C034560.2	MELO3C034560.2	0.905214	0	0	5.09358	5.40334	5.97792	13.0782	10.3244	16.3305	0.704951	3.36072	3.4569	2.16741	13.1527	7.81057	19.1383	19.0489	6.56639	0.0510247	1.75871	normal	0.551854	0.39539	normal	0.535852	0.321116	normal
MELO3C026019.2	MELO3C026019.2	35.4345	52.056	47.391	2.9718	7.2133	8.02272	2.36552	23.3767	26.8803	1.38262	2.62788	3.18465	24.8398	30.2447	21.288	0.948094	0	0.315012	1.09537e-34	-4.22859	down	2.60236e-06	1.74509	up	3.10321e-06	-2.77058	down
MELO3C010317.2	MELO3C010317.2	36.7143	23.0049	16.258	9.3212	4.62593	5.22885	18.1706	15.5543	19.2848	22.1607	16.3755	12.7002	15.2827	15.3984	20.2619	14.559	14.5616	11.0817	0.0454765	-0.766046	normal	0.000389865	1.30638	up	0.669442	-0.160873	normal
MELO3C015359.2	MELO3C015359.2	4.57008	1.52461	2.54294	21.0259	18.9489	19.6951	15.3052	12.7474	8.70623	0.935086	0.629411	1.28213	17.3502	19.02	23.0369	27.3072	49.4636	36.6138	0.0943466	-1.27788	normal	0.9919	-0.00595182	normal	4.025e-07	1.67953	up
MELO3C014091.2	MELO3C014091.2	3.80235	1.41239	2.58531	24.2941	19.6574	18.4487	30.1325	21.5871	24.1345	8.55778	10.2114	8.63448	10.1324	27.2769	10.5796	27.9883	43.2871	32.9486	0.00211522	1.46533	up	0.692398	-0.237455	normal	0.0277582	0.615474	normal
MELO3C004382.2	MELO3C004382.2	36.7799	35.3247	27.5464	54.7288	28.7961	45.6195	43.0842	39.8765	32.5635	101.729	92.117	103.678	50.7306	49.0022	50.2522	53.4174	41.6957	45.6729	6.62453e-14	1.40003	up	0.402512	0.320194	normal	0.0781321	0.459091	normal
CmoCh07G009530	CmoCh07G009530	2.34537	6.6261	10.6709	3.88877	2.70823	2.87741	14.1053	10.892	18.8441	2.17271	4.18826	3.83607	0.750048	0.610587	0.62063	0.135229	0.325434	2.03796	0.139682	-0.87426	normal	2.72825e-09	-1.84804	down	0.000868668	-1.98032	down
CmoCh08G005650	CmoCh08G005650	0.725321	1.01973	2.68223	0.309005	0.264066	0.217005	1.15376	1.03077	1.88859	1.04933	1.52024	1.28463	0.17116	0	0.158637	0.111667	0.278592	0.465681	0.749457	-0.282367	normal	--	--	--	0.00101557	-1.67704	down
CmoCh08G003030	CmoCh08G003030	216.496	520.744	406.207	75.302	61.9735	57.1654	68.418	132.974	76.1077	406.63	536.518	668.535	40.8006	30.7421	66.6927	54.6161	22.3826	15.8398	0.518446	0.332395	normal	0.441234	-0.267037	normal	0.0335608	-1.15131	normal
CmoCh20G005830	CmoCh20G005830	7.7766	6.28003	6.73387	1.49859	1.80225	1.77447	4.91055	5.67607	5.27443	4.4937	3.85091	5.12885	2.00189	1.46219	2.1045	3.71661	3.51035	4.24015	0.00582847	-0.73221	normal	0.417979	0.312158	normal	0.02878	-0.463713	normal
