# Supplementary material for: Transcriptomic analysis and physiological characteristics of exogenous naphthylacetic acid application to regulate the healing process of oriental melon grafted onto squash
Source: PeerJ. 2022 Sep 15;10:e13980. doi: 10.7717/peerj.13980 (PMC9482769; doi:10.7717/peerj.13980)
Supplement: Supplemental Information 9 [file peerj-10-13980-s009.xls]

## Sheet: KEGG_pathway_enrich_dotplot
ID	Description	GeneRatio	BgRatio	enrich_factor	pvalue	qvalue	geneID	Count	regulated
ko00280	Valine, leucine and isoleucine degradation	19/708	44/4875	2.97	3.72e-06	0.00038359	MELO3C006334.2/MELO3C006679.2/MELO3C006735.2/MELO3C008063.2/MELO3C010493.2/MELO3C010494.2/MELO3C010776.2/MELO3C011705.2/MELO3C014601.2/MELO3C015564.2/MELO3C015796.2/MELO3C016959.2/MELO3C017571.2/MELO3C018060.2/MELO3C018456.2/MELO3C018583.2/MELO3C025757.2/MELO3C026045.2/MELO3C026972.2	19	up&down
ko03010	Ribosome	84/708	371/4875	1.56	8.58e-06	0.000442327	MELO3C002703.2/MELO3C002719.2/MELO3C002800.2/MELO3C003834.2/MELO3C004612.2/MELO3C004617.2/MELO3C004645.2/MELO3C004713.2/MELO3C004891.2/MELO3C005411.2/MELO3C005446.2/MELO3C005472.2/MELO3C005830.2/MELO3C005844.2/MELO3C005912.2/MELO3C006421.2/MELO3C006471.2/MELO3C006662.2/MELO3C006752.2/MELO3C007120.2/MELO3C007635.2/MELO3C007639.2/MELO3C007828.2/MELO3C007869.2/MELO3C007892.2/MELO3C009436.2/MELO3C009…	84	up&down
ko00410	beta-Alanine metabolism	16/708	42/4875	2.62	0.000136501	0.00469373	MELO3C002149.2/MELO3C005224.2/MELO3C005577.2/MELO3C008477.2/MELO3C010493.2/MELO3C010494.2/MELO3C014480.2/MELO3C014554.2/MELO3C014601.2/MELO3C016959.2/MELO3C018583.2/MELO3C018607.2/MELO3C023571.2/MELO3C025078.2/MELO3C026264.2/MELO3C026972.2	16	up&down
ko00592	alpha-Linolenic acid metabolism	18/708	57/4875	2.17	0.000787595	0.0203117	MELO3C000204.2/MELO3C006334.2/MELO3C007845.2/MELO3C007846.2/MELO3C007848.2/MELO3C007849.2/MELO3C008075.2/MELO3C011885.2/MELO3C017590.2/MELO3C018060.2/MELO3C018413.2/MELO3C019320.2/MELO3C020721.2/MELO3C021318.2/MELO3C021326.2/MELO3C022090.2/MELO3C023685.2/MELO3C029299.2	18	up&down
ko00360	Phenylalanine metabolism	18/708	61/4875	2.03	0.0018872	0.0389359	MELO3C003932.2/MELO3C003933.2/MELO3C004955.2/MELO3C005577.2/MELO3C013583.2/MELO3C014227.2/MELO3C014228.2/MELO3C014229.2/MELO3C014480.2/MELO3C017809.2/MELO3C018450.2/MELO3C020793.2/MELO3C022770.2/MELO3C022961.2/MELO3C024724.2/MELO3C024886.2/MELO3C025613.2/MELO3C026264.2	18	up&down
ko01040	Biosynthesis of unsaturated fatty acids	8/708	21/4875	2.62	0.00671463	0.115444	MELO3C006334.2/MELO3C008413.2/MELO3C008796.2/MELO3C009630.2/MELO3C016419.2/MELO3C017590.2/MELO3C018060.2/MELO3C019320.2	8	up&down
ko00910	Nitrogen metabolism	11/708	35/4875	2.16	0.00841838	0.12406	MELO3C005444.2/MELO3C007621.2/MELO3C008481.2/MELO3C009476.2/MELO3C009759.2/MELO3C010444.2/MELO3C011095.2/MELO3C013031.2/MELO3C017628.2/MELO3C023599.2/MELO3C024476.2	11	up&down
ko00071	Fatty acid degradation	11/708	37/4875	2.05	0.0131304	0.155915	MELO3C005749.2/MELO3C006334.2/MELO3C010493.2/MELO3C010494.2/MELO3C014601.2/MELO3C017590.2/MELO3C018060.2/MELO3C019320.2/MELO3C021318.2/MELO3C021326.2/MELO3C023685.2	11	up&down
ko00130	Ubiquinone and other terpenoid-quinone biosynthesis	12/708	42/4875	1.97	0.0136028	0.155915	MELO3C003932.2/MELO3C003933.2/MELO3C004955.2/MELO3C007808.2/MELO3C012178.2/MELO3C013583.2/MELO3C022770.2/MELO3C022961.2/MELO3C024724.2/MELO3C024886.2/MELO3C025613.2/MELO3C031003.2	12	up&down
ko04075	Plant hormone signal transduction	53/708	282/4875	1.29	0.0248867	0.256726	MELO3C000885.2/MELO3C003035.2/MELO3C003412.2/MELO3C003765.2/MELO3C003768.2/MELO3C004382.2/MELO3C004498.2/MELO3C004728.2/MELO3C005991.2/MELO3C006593.2/MELO3C006693.2/MELO3C006771.2/MELO3C006852.2/MELO3C007691.2/MELO3C007739.2/MELO3C007893.2/MELO3C008128.2/MELO3C008478.2/MELO3C008672.2/MELO3C008882.2/MELO3C009181.2/MELO3C010245.2/MELO3C010836.2/MELO3C011260.2/MELO3C012031.2/MELO3C012951.2/MELO3C013…	53	up&down
ko04712	Circadian rhythm - plant	11/708	41/4875	1.85	0.0281912	0.264377	MELO3C003316.2/MELO3C003575.2/MELO3C006717.2/MELO3C007615.2/MELO3C010015.2/MELO3C010769.2/MELO3C014767.2/MELO3C022995.2/MELO3C024067.2/MELO3C026502.2/MELO3C030034.2	11	up&down
ko00260	Glycine, serine and threonine metabolism	20/708	90/4875	1.53	0.0310461	0.266887	MELO3C004421.2/MELO3C005577.2/MELO3C006155.2/MELO3C006166.2/MELO3C006735.2/MELO3C010162.2/MELO3C010431.2/MELO3C011367.2/MELO3C013732.2/MELO3C014480.2/MELO3C015151.2/MELO3C015708.2/MELO3C017224.2/MELO3C017571.2/MELO3C020429.2/MELO3C021742.2/MELO3C023371.2/MELO3C025791.2/MELO3C026045.2/MELO3C026264.2	20	up&down
ko04140	Regulation of autophagy	10/708	37/4875	1.86	0.0339077	0.269065	MELO3C002452.2/MELO3C008520.2/MELO3C009226.2/MELO3C015420.2/MELO3C019565.2/MELO3C021148.2/MELO3C022280.2/MELO3C022308.2/MELO3C023607.2/MELO3C026055.2	10	up&down
ko00940	Phenylpropanoid biosynthesis	33/708	169/4875	1.34	0.042375	0.312237	MELO3C002122.2/MELO3C002457.2/MELO3C003735.2/MELO3C003932.2/MELO3C003933.2/MELO3C004955.2/MELO3C005809.2/MELO3C007545.2/MELO3C007618.2/MELO3C007702.2/MELO3C009924.2/MELO3C014091.2/MELO3C014227.2/MELO3C014228.2/MELO3C014229.2/MELO3C014252.2/MELO3C017566.2/MELO3C017809.2/MELO3C018149.2/MELO3C018450.2/MELO3C018656.2/MELO3C019548.2/MELO3C019994.2/MELO3C021373.2/MELO3C022770.2/MELO3C023272.2/MELO3C024…	33	up&down
ko00941	Flavonoid biosynthesis	7/708	24/4875	2.01	0.0488464	0.335926	MELO3C003932.2/MELO3C003933.2/MELO3C014767.2/MELO3C018450.2/MELO3C025484.2/MELO3C030167.2/MELO3C035229.2	7	up
ko00710	Carbon fixation in photosynthetic organisms	17/708	79/4875	1.48	0.0580971	0.374574	MELO3C002342.2/MELO3C002343.2/MELO3C003491.2/MELO3C005348.2/MELO3C007687.2/MELO3C008219.2/MELO3C008879.2/MELO3C011129.2/MELO3C011682.2/MELO3C016050.2/MELO3C016095.2/MELO3C017175.2/MELO3C018994.2/MELO3C019633.2/MELO3C024307.2/MELO3C024519.2/MELO3C025636.2	17	up&down
ko00270	Cysteine and methionine metabolism	19/708	92/4875	1.42	0.0670773	0.394826	MELO3C006580.2/MELO3C007425.2/MELO3C008477.2/MELO3C009782.2/MELO3C010776.2/MELO3C011852.2/MELO3C013583.2/MELO3C013774.2/MELO3C014294.2/MELO3C015794.2/MELO3C016050.2/MELO3C016095.2/MELO3C017175.2/MELO3C017571.2/MELO3C020432.2/MELO3C021182.2/MELO3C025613.2/MELO3C026045.2/MELO3C026604.2	19	up&down
ko00051	Fructose and mannose metabolism	13/708	58/4875	1.54	0.0688931	0.394826	MELO3C003813.2/MELO3C006866.2/MELO3C008241.2/MELO3C008879.2/MELO3C011682.2/MELO3C013009.2/MELO3C013622.2/MELO3C014574.2/MELO3C015169.2/MELO3C019796.2/MELO3C022452.2/MELO3C024519.2/MELO3C032603.2	13	up&down
ko00630	Glyoxylate and dicarboxylate metabolism	17/708	82/4875	1.43	0.07788	0.422839	MELO3C002350.2/MELO3C006155.2/MELO3C006166.2/MELO3C006735.2/MELO3C007621.2/MELO3C009759.2/MELO3C010431.2/MELO3C015151.2/MELO3C016050.2/MELO3C016095.2/MELO3C017024.2/MELO3C017175.2/MELO3C019243.2/MELO3C020429.2/MELO3C021742.2/MELO3C023371.2/MELO3C023599.2	17	up&down
ko01230	Biosynthesis of amino acids	46/708	260/4875	1.22	0.0831588	0.428924	MELO3C002342.2/MELO3C002343.2/MELO3C003344.2/MELO3C003379.2/MELO3C003381.2/MELO3C003814.2/MELO3C004421.2/MELO3C004795.2/MELO3C004797.2/MELO3C007451.2/MELO3C007642.2/MELO3C008219.2/MELO3C008481.2/MELO3C008879.2/MELO3C009277.2/MELO3C009782.2/MELO3C010018.2/MELO3C010162.2/MELO3C010431.2/MELO3C010776.2/MELO3C011208.2/MELO3C011367.2/MELO3C011852.2/MELO3C013009.2/MELO3C013583.2/MELO3C013732.2/MELO3C013…	46	up&down
ko00250	Alanine, aspartate and glutamate metabolism	17/708	85/4875	1.38	0.101658	0.479496	MELO3C002203.2/MELO3C005224.2/MELO3C005444.2/MELO3C008481.2/MELO3C009038.2/MELO3C013031.2/MELO3C015151.2/MELO3C017571.2/MELO3C017628.2/MELO3C020749.2/MELO3C023599.2/MELO3C024307.2/MELO3C025078.2/MELO3C026045.2/MELO3C026229.2/MELO3C026828.2/MELO3C032808.2	17	up&down
ko01200	Carbon metabolism	51/708	296/4875	1.19	0.10226	0.479496	MELO3C002342.2/MELO3C002343.2/MELO3C002350.2/MELO3C003379.2/MELO3C003381.2/MELO3C003491.2/MELO3C004430.2/MELO3C005348.2/MELO3C005444.2/MELO3C005910.2/MELO3C006155.2/MELO3C006166.2/MELO3C006735.2/MELO3C007621.2/MELO3C007687.2/MELO3C008219.2/MELO3C008879.2/MELO3C010431.2/MELO3C011129.2/MELO3C011367.2/MELO3C011682.2/MELO3C011852.2/MELO3C012035.2/MELO3C012159.2/MELO3C013009.2/MELO3C013732.2/MELO3C013…	51	up&down
ko00906	Carotenoid biosynthesis	8/708	34/4875	1.62	0.109286	0.490163	MELO3C002744.2/MELO3C005704.2/MELO3C006938.2/MELO3C007127.2/MELO3C010858.2/MELO3C018449.2/MELO3C023086.2/MELO3C027057.2	8	up&down
ko00220	Arginine biosynthesis	10/708	46/4875	1.5	0.120494	0.490715	MELO3C003814.2/MELO3C005444.2/MELO3C007642.2/MELO3C009277.2/MELO3C011208.2/MELO3C013031.2/MELO3C017628.2/MELO3C023599.2/MELO3C024307.2/MELO3C026229.2	10	up&down
ko00010	Glycolysis / Gluconeogenesis	26/708	142/4875	1.26	0.120867	0.490715	MELO3C002342.2/MELO3C002343.2/MELO3C003381.2/MELO3C003491.2/MELO3C004430.2/MELO3C006735.2/MELO3C007687.2/MELO3C008219.2/MELO3C008879.2/MELO3C009145.2/MELO3C009884.2/MELO3C010493.2/MELO3C010494.2/MELO3C011367.2/MELO3C011682.2/MELO3C012035.2/MELO3C013009.2/MELO3C014574.2/MELO3C014601.2/MELO3C015169.2/MELO3C017268.2/MELO3C018994.2/MELO3C019633.2/MELO3C023685.2/MELO3C024514.2/MELO3C024519.2	26	up&down
ko00565	Ether lipid metabolism	6/708	24/4875	1.72	0.12368	0.490715	MELO3C006158.2/MELO3C011336.2/MELO3C014016.2/MELO3C017887.2/MELO3C020721.2/MELO3C025856.2	6	up&down
ko03008	Ribosome biogenesis in eukaryotes	17/708	89/4875	1.32	0.13969	0.53371	MELO3C002022.2/MELO3C002060.2/MELO3C004350.2/MELO3C004514.2/MELO3C006945.2/MELO3C007615.2/MELO3C007816.2/MELO3C009764.2/MELO3C010355.2/MELO3C010735.2/MELO3C015885.2/MELO3C016827.2/MELO3C020849.2/MELO3C021295.2/MELO3C023398.2/MELO3C024484.2/MELO3C029467.2	17	up&down
ko04120	Ubiquitin mediated proteolysis	20/708	108/4875	1.28	0.146386	0.539318	MELO3C003316.2/MELO3C003660.2/MELO3C005691.2/MELO3C005733.2/MELO3C006225.2/MELO3C006615.2/MELO3C009310.2/MELO3C009417.2/MELO3C012407.2/MELO3C012437.2/MELO3C012564.2/MELO3C013750.2/MELO3C020827.2/MELO3C022842.2/MELO3C024482.2/MELO3C025853.2/MELO3C026951.2/MELO3C031660.2/MELO3C034034.2/MELO3C034878.2	20	up&down
ko00290	Valine, leucine and isoleucine biosynthesis	4/708	16/4875	1.72	0.193396	0.593672	MELO3C003344.2/MELO3C010018.2/MELO3C010776.2/MELO3C020296.2	4	up&down
ko00909	Sesquiterpenoid and triterpenoid biosynthesis	4/708	16/4875	1.72	0.193396	0.593672	Cucumis_melo_newGene_422/MELO3C004329.2/MELO3C016845.2/MELO3C018550.2	4	up&down
ko00640	Propanoate metabolism	8/708	39/4875	1.41	0.196185	0.593672	MELO3C006679.2/MELO3C006735.2/MELO3C008063.2/MELO3C011705.2/MELO3C015564.2/MELO3C016959.2/MELO3C018583.2/MELO3C026972.2	8	up&down
ko00053	Ascorbate and aldarate metabolism	9/708	45/4875	1.38	0.197257	0.593672	MELO3C003559.2/MELO3C004377.2/MELO3C010493.2/MELO3C010494.2/MELO3C014601.2/MELO3C015430.2/MELO3C015643.2/MELO3C020719.2/MELO3C021554.2	9	up&down
ko00350	Tyrosine metabolism	9/708	45/4875	1.38	0.197257	0.593672	MELO3C005577.2/MELO3C013583.2/MELO3C014480.2/MELO3C016089.2/MELO3C022961.2/MELO3C023220.2/MELO3C023685.2/MELO3C025613.2/MELO3C026264.2	9	up&down
ko00430	Taurine and hypotaurine metabolism	3/708	11/4875	1.88	0.206687	0.593672	MELO3C005224.2/MELO3C017267.2/MELO3C025078.2	3	up&down
ko00740	Riboflavin metabolism	3/708	11/4875	1.88	0.206687	0.593672	MELO3C000760.2/MELO3C009621.2/MELO3C011439.2	3	up&down
ko01212	Fatty acid metabolism	12/708	64/4875	1.29	0.210748	0.593672	MELO3C002722.2/MELO3C005749.2/MELO3C006334.2/MELO3C008413.2/MELO3C008796.2/MELO3C009630.2/MELO3C016419.2/MELO3C017590.2/MELO3C018060.2/MELO3C019320.2/MELO3C021318.2/MELO3C021326.2	12	up&down
ko00561	Glycerolipid metabolism	11/708	58/4875	1.31	0.212934	0.593672	MELO3C002571.2/MELO3C003440.2/MELO3C007072.2/MELO3C010493.2/MELO3C010494.2/MELO3C012430.2/MELO3C014601.2/MELO3C015908.2/MELO3C020721.2/MELO3C021206.2/MELO3C023371.2	11	up&down
ko00460	Cyanoamino acid metabolism	11/708	60/4875	1.26	0.247407	0.65532	MELO3C002122.2/MELO3C004053.2/MELO3C004059.2/MELO3C007621.2/MELO3C010431.2/MELO3C015058.2/MELO3C018149.2/MELO3C020429.2/MELO3C025585.2/MELO3C026609.2/MELO3C030711.2	11	up&down
ko00905	Brassinosteroid biosynthesis	3/708	12/4875	1.72	0.247751	0.65532	MELO3C017559.2/MELO3C021600.2/MELO3C022045.2	3	up&down
ko00730	Thiamine metabolism	4/708	18/4875	1.53	0.25947	0.659327	MELO3C007668.2/MELO3C017499.2/MELO3C021375.2/MELO3C025408.2	4	up&down
ko00770	Pantothenate and CoA biosynthesis	5/708	24/4875	1.43	0.263151	0.659327	MELO3C002149.2/MELO3C010018.2/MELO3C010776.2/MELO3C014554.2/MELO3C018607.2	5	up&down
ko00660	C5-Branched dibasic acid metabolism	2/708	7/4875	1.97	0.270075	0.659327	MELO3C003344.2/MELO3C010018.2	2	up&down
ko00400	Phenylalanine, tyrosine and tryptophan biosynthesis	9/708	49/4875	1.26	0.275631	0.659327	MELO3C004795.2/MELO3C004797.2/MELO3C007451.2/MELO3C013583.2/MELO3C016962.2/MELO3C019790.2/MELO3C020958.2/MELO3C021449.2/MELO3C025613.2	9	up&down
ko00950	Isoquinoline alkaloid biosynthesis	5/708	25/4875	1.38	0.292966	0.659327	MELO3C005577.2/MELO3C013583.2/MELO3C014480.2/MELO3C025613.2/MELO3C026264.2	5	up&down
ko00960	Tropane, piperidine and pyridine alkaloid biosynthesis	5/708	25/4875	1.38	0.292966	0.659327	MELO3C005577.2/MELO3C013583.2/MELO3C014480.2/MELO3C025613.2/MELO3C026264.2	5	up&down
ko00670	One carbon pool by folate	4/708	19/4875	1.45	0.294006	0.659327	MELO3C002406.2/MELO3C010431.2/MELO3C020429.2/MELO3C027379.2	4	up
ko00330	Arginine and proline metabolism	10/708	57/4875	1.21	0.309929	0.671374	MELO3C002203.2/MELO3C006580.2/MELO3C008477.2/MELO3C010493.2/MELO3C010494.2/MELO3C014601.2/MELO3C020793.2/MELO3C022076.2/MELO3C023359.2/MELO3C023571.2	10	up&down
ko04141	Protein processing in endoplasmic reticulum	32/708	201/4875	1.1	0.312394	0.671374	MELO3C000592.2/MELO3C002388.2/MELO3C002465.2/MELO3C003119.2/MELO3C005733.2/MELO3C005757.2/MELO3C005923.2/MELO3C007285.2/MELO3C011021.2/MELO3C012331.2/MELO3C012407.2/MELO3C013615.2/MELO3C013750.2/MELO3C013945.2/MELO3C013946.2/MELO3C015294.2/MELO3C015295.2/MELO3C015938.2/MELO3C015939.2/MELO3C016706.2/MELO3C016897.2/MELO3C018461.2/MELO3C020588.2/MELO3C021648.2/MELO3C021658.2/MELO3C023358.2/MELO3C025…	32	up&down
ko00052	Galactose metabolism	10/708	59/4875	1.17	0.350589	0.738082	MELO3C005640.2/MELO3C009884.2/MELO3C009979.2/MELO3C012472.2/MELO3C013009.2/MELO3C014574.2/MELO3C015169.2/MELO3C023110.2/MELO3C025521.2/MELO3C025599.2	10	up&down
ko00310	Lysine degradation	4/708	21/4875	1.31	0.364343	0.751698	MELO3C010493.2/MELO3C010494.2/MELO3C014601.2/MELO3C015556.2	4	up&down
ko02010	ABC transporters	4/708	22/4875	1.25	0.399525	0.808121	MELO3C015409.2/MELO3C021982.2/MELO3C023103.2/MELO3C025468.2	4	up&down
ko00620	Pyruvate metabolism	17/708	110/4875	1.06	0.43098	0.829758	MELO3C002350.2/MELO3C003381.2/MELO3C003491.2/MELO3C005348.2/MELO3C006735.2/MELO3C007687.2/MELO3C010493.2/MELO3C010494.2/MELO3C011129.2/MELO3C012035.2/MELO3C014601.2/MELO3C016050.2/MELO3C016095.2/MELO3C017175.2/MELO3C018994.2/MELO3C020296.2/MELO3C025636.2	17	up&down
ko00562	Inositol phosphate metabolism	10/708	63/4875	1.09	0.433629	0.829758	MELO3C003426.2/MELO3C007774.2/MELO3C008296.2/MELO3C008879.2/MELO3C015430.2/MELO3C017581.2/MELO3C018583.2/MELO3C020550.2/MELO3C024309.2/MELO3C025856.2	10	up&down
ko00450	Selenocompound metabolism	4/708	23/4875	1.2	0.434353	0.829758	MELO3C009782.2/MELO3C013774.2/MELO3C014533.2/MELO3C026604.2	4	up&down
ko00020	Citrate cycle (TCA cycle)	8/708	50/4875	1.1	0.44316	0.83119	MELO3C003491.2/MELO3C006735.2/MELO3C007687.2/MELO3C012035.2/MELO3C016050.2/MELO3C016095.2/MELO3C017175.2/MELO3C018994.2	8	up&down
ko00945	Stilbenoid, diarylheptanoid and gingerol biosynthesis	3/708	17/4875	1.22	0.457745	0.843214	MELO3C003932.2/MELO3C003933.2/MELO3C018450.2	3	up
ko01210	2-Oxocarboxylic acid metabolism	9/708	58/4875	1.07	0.471082	0.852559	MELO3C003344.2/MELO3C007642.2/MELO3C009277.2/MELO3C010018.2/MELO3C010776.2/MELO3C011208.2/MELO3C015058.2/MELO3C020296.2/MELO3C024307.2	9	up&down
ko03430	Mismatch repair	6/708	38/4875	1.09	0.481473	0.85634	MELO3C002071.2/MELO3C009479.2/MELO3C012349.2/MELO3C017228.2/MELO3C017287.2/MELO3C025879.2	6	up
ko00340	Histidine metabolism	3/708	18/4875	1.15	0.497399	0.859305	MELO3C010493.2/MELO3C010494.2/MELO3C014601.2	3	up&down
ko00480	Glutathione metabolism	14/708	94/4875	1.03	0.504336	0.859305	MELO3C003559.2/MELO3C005667.2/MELO3C006220.2/MELO3C006355.2/MELO3C008017.2/MELO3C008477.2/MELO3C014795.2/MELO3C016031.2/MELO3C016349.2/MELO3C020719.2/MELO3C021250.2/MELO3C032562.2/MELO3C032563.2/MELO3C033196.2	14	up&down
ko00380	Tryptophan metabolism	6/708	39/4875	1.06	0.50813	0.859305	MELO3C010493.2/MELO3C010494.2/MELO3C014601.2/MELO3C017024.2/MELO3C020793.2/MELO3C026272.2	6	up&down
ko00564	Glycerophospholipid metabolism	13/708	88/4875	1.02	0.520126	0.863139	MELO3C002033.2/MELO3C003440.2/MELO3C006158.2/MELO3C011336.2/MELO3C014016.2/MELO3C014464.2/MELO3C015908.2/MELO3C017356.2/MELO3C017887.2/MELO3C020721.2/MELO3C021206.2/MELO3C024063.2/MELO3C025856.2	13	up&down
ko00600	Sphingolipid metabolism	4/708	26/4875	1.06	0.534543	0.863139	MELO3C007311.2/MELO3C012472.2/MELO3C022321.2/MELO3C026551.2	4	up&down
ko00511	Other glycan degradation	3/708	19/4875	1.09	0.535536	0.863139	MELO3C005109.2/MELO3C007919.2/MELO3C012472.2	3	up&down
ko00232	Caffeine metabolism	1/708	5/4875	1.38	0.543865	0.863139	MELO3C015199.2	1	down
ko00240	Pyrimidine metabolism	21/708	146/4875	0.99	0.556328	0.86954	MELO3C002044.2/MELO3C002149.2/MELO3C003165.2/MELO3C005939.2/MELO3C006993.2/MELO3C007348.2/MELO3C008017.2/MELO3C008043.2/MELO3C009794.2/MELO3C009975.2/MELO3C010935.2/MELO3C012572.2/MELO3C013741.2/MELO3C014554.2/MELO3C014795.2/MELO3C015940.2/MELO3C017579.2/MELO3C018607.2/MELO3C021758.2/MELO3C024536.2/MELO3C025541.2	21	up&down
ko00520	Amino sugar and nucleotide sugar metabolism	18/708	127/4875	0.98	0.584524	0.894103	MELO3C002047.2/MELO3C004377.2/MELO3C005640.2/MELO3C006070.2/MELO3C007043.2/MELO3C008241.2/MELO3C009473.2/MELO3C009710.2/MELO3C009722.2/MELO3C010186.2/MELO3C014574.2/MELO3C015169.2/MELO3C018969.2/MELO3C021412.2/MELO3C021813.2/MELO3C022452.2/MELO3C025427.2/MELO3C032603.2	18	up&down
ko00591	Linoleic acid metabolism	5/708	35/4875	0.98	0.589378	0.894103	MELO3C004252.2/MELO3C004253.2/MELO3C011885.2/MELO3C014482.2/MELO3C020721.2	5	up&down
ko00590	Arachidonic acid metabolism	2/708	14/4875	0.98	0.624847	0.912801	MELO3C005667.2/MELO3C020721.2	2	up&down
ko03060	Protein export	7/708	51/4875	0.95	0.625518	0.912801	MELO3C004285.2/MELO3C005757.2/MELO3C011874.2/MELO3C016291.2/MELO3C016721.2/MELO3C020652.2/MELO3C024550.2	7	up&down
ko00030	Pentose phosphate pathway	8/708	59/4875	0.93	0.640342	0.912801	MELO3C003379.2/MELO3C004430.2/MELO3C005910.2/MELO3C011682.2/MELO3C012159.2/MELO3C013009.2/MELO3C013871.2/MELO3C024519.2	8	up&down
ko00100	Steroid biosynthesis	4/708	30/4875	0.92	0.65261	0.912801	MELO3C016845.2/MELO3C018550.2/MELO3C020602.2/MELO3C020721.2	4	up&down
ko00860	Porphyrin and chlorophyll metabolism	6/708	46/4875	0.9	0.676229	0.912801	MELO3C010614.2/MELO3C011113.2/MELO3C014571.2/MELO3C017176.2/MELO3C020913.2/MELO3C025347.2	6	up&down
ko04626	Plant-pathogen interaction	18/708	134/4875	0.92	0.679292	0.912801	MELO3C000592.2/MELO3C005719.2/MELO3C006031.2/MELO3C006721.2/MELO3C006980.2/MELO3C011021.2/MELO3C014128.2/MELO3C015294.2/MELO3C015295.2/MELO3C019590.2/MELO3C020263.2/MELO3C020900.2/MELO3C025781.2/MELO3C025976.2/MELO3C026331.2/MELO3C027461.2/MELO3C030256.2/MELO3C030883.2	18	up&down
ko00900	Terpenoid backbone biosynthesis	7/708	55/4875	0.88	0.705704	0.912801	MELO3C004281.2/MELO3C013480.2/MELO3C017176.2/MELO3C017499.2/MELO3C020397.2/MELO3C021375.2/MELO3C023775.2	7	up&down
ko03030	DNA replication	7/708	55/4875	0.88	0.705704	0.912801	MELO3C002044.2/MELO3C002071.2/MELO3C006248.2/MELO3C009479.2/MELO3C012349.2/MELO3C017228.2/MELO3C025879.2	7	up
ko04146	Peroxisome	11/708	85/4875	0.89	0.70817	0.912801	MELO3C004281.2/MELO3C005749.2/MELO3C006334.2/MELO3C015151.2/MELO3C015199.2/MELO3C016541.2/MELO3C017024.2/MELO3C017590.2/MELO3C017989.2/MELO3C018060.2/MELO3C019320.2	11	up&down
ko03450	Non-homologous end-joining	1/708	8/4875	0.86	0.715314	0.912801	MELO3C003972.2	1	down
ko00062	Fatty acid elongation	3/708	25/4875	0.83	0.725604	0.912801	MELO3C006484.2/MELO3C012246.2/MELO3C016419.2	3	up
ko03018	RNA degradation	14/708	111/4875	0.87	0.757625	0.912801	MELO3C002181.2/MELO3C009794.2/MELO3C009975.2/MELO3C011292.2/MELO3C013009.2/MELO3C015568.2/MELO3C016196.2/MELO3C017268.2/MELO3C021158.2/MELO3C023058.2/MELO3C023523.2/MELO3C024388.2/MELO3C024514.2/MELO3C025782.2	14	up&down
ko04122	Sulfur relay system	2/708	18/4875	0.77	0.759762	0.912801	MELO3C007668.2/MELO3C014598.2	2	up&down
ko00300	Lysine biosynthesis	1/708	10/4875	0.69	0.792123	0.912801	MELO3C018037.2	1	up
ko00920	Sulfur metabolism	5/708	45/4875	0.77	0.803195	0.912801	MELO3C002450.2/MELO3C002563.2/MELO3C011852.2/MELO3C015186.2/MELO3C016630.2	5	up&down
ko00780	Biotin metabolism	2/708	20/4875	0.69	0.809938	0.912801	MELO3C002722.2/MELO3C008796.2	2	up
ko00230	Purine metabolism	25/708	201/4875	0.86	0.830947	0.912801	MELO3C002044.2/MELO3C002349.2/MELO3C002406.2/MELO3C003379.2/MELO3C003381.2/MELO3C005556.2/MELO3C005939.2/MELO3C007348.2/MELO3C008017.2/MELO3C009038.2/MELO3C009344.2/MELO3C009621.2/MELO3C009794.2/MELO3C009975.2/MELO3C011270.2/MELO3C013741.2/MELO3C013871.2/MELO3C014795.2/MELO3C014867.2/MELO3C015199.2/MELO3C017579.2/MELO3C020749.2/MELO3C021758.2/MELO3C023150.2/MELO3C025998.2	25	up&down
ko03440	Homologous recombination	5/708	47/4875	0.73	0.833168	0.912801	MELO3C002071.2/MELO3C009479.2/MELO3C012349.2/MELO3C017228.2/MELO3C031352.2	5	up
ko03410	Base excision repair	4/708	40/4875	0.69	0.853054	0.912801	MELO3C010637.2/MELO3C019611.2/MELO3C022371.2/MELO3C025879.2	4	up
ko00061	Fatty acid biosynthesis	4/708	41/4875	0.67	0.866278	0.912801	MELO3C002722.2/MELO3C005749.2/MELO3C008413.2/MELO3C008796.2	4	up&down
ko00750	Vitamin B6 metabolism	2/708	23/4875	0.6	0.867747	0.912801	MELO3C013732.2/MELO3C025846.2	2	up
ko03040	Spliceosome	23/708	194/4875	0.82	0.883132	0.912801	MELO3C002030.2/MELO3C002181.2/MELO3C003119.2/MELO3C004305.2/MELO3C004514.2/MELO3C004580.2/MELO3C004799.2/MELO3C006732.2/MELO3C009973.2/MELO3C010355.2/MELO3C011357.2/MELO3C015733.2/MELO3C017216.2/MELO3C017226.2/MELO3C017522.2/MELO3C021648.2/MELO3C021658.2/MELO3C023427.2/MELO3C023809.2/MELO3C024028.2/MELO3C024552.2/MELO3C027093.2/MELO3C032507.2	23	up&down
ko04933	AGE-RAGE signaling pathway in diabetic complications	1/708	14/4875	0.49	0.889209	0.912801	MELO3C008296.2	1	up
ko00904	Diterpenoid biosynthesis	3/708	34/4875	0.61	0.890161	0.912801	MELO3C011218.2/MELO3C013868.2/MELO3C030787.2	3	up&down
ko00908	Zeatin biosynthesis	2/708	25/4875	0.55	0.896804	0.912801	MELO3C019171.2/MELO3C022098.2	2	up&down
ko00073	Cutin, suberine and wax biosynthesis	2/708	27/4875	0.51	0.919826	0.912801	MELO3C016974.2/MELO3C021205.2	2	up
ko00760	Nicotinate and nicotinamide metabolism	1/708	17/4875	0.41	0.930918	0.912801	MELO3C024536.2	1	down
ko04070	Phosphatidylinositol signaling system	5/708	57/4875	0.6	0.93207	0.912801	MELO3C003426.2/MELO3C006721.2/MELO3C008296.2/MELO3C021971.2/MELO3C024309.2	5	up&down
ko00790	Folate biosynthesis	1/708	18/4875	0.38	0.940986	0.912801	MELO3C020077.2	1	up
ko00650	Butanoate metabolism	4/708	50/4875	0.55	0.94571	0.912801	MELO3C005224.2/MELO3C010018.2/MELO3C025078.2/MELO3C032808.2	4	up&down
ko04145	Phagosome	6/708	71/4875	0.58	0.957335	0.912801	MELO3C002388.2/MELO3C002830.2/MELO3C005673.2/MELO3C018532.2/MELO3C024309.2/MELO3C026613.2	6	up&down
ko03420	Nucleotide excision repair	5/708	62/4875	0.56	0.958291	0.912801	MELO3C009479.2/MELO3C012349.2/MELO3C017228.2/MELO3C025853.2/MELO3C025879.2	5	up&down
ko00196	Photosynthesis - antenna proteins	1/708	21/4875	0.33	0.963218	0.912801	MELO3C007152.2	1	up
ko00040	Pentose and glucuronate interconversions	13/708	135/4875	0.66	0.966588	0.912801	MELO3C002319.2/MELO3C006338.2/MELO3C006866.2/MELO3C010493.2/MELO3C010494.2/MELO3C010706.2/MELO3C012316.2/MELO3C014601.2/MELO3C015130.2/MELO3C015419.2/MELO3C019840.2/MELO3C021607.2/MELO3C027408.2	13	up&down
ko04130	SNARE interactions in vesicular transport	2/708	36/4875	0.38	0.975317	0.912801	MELO3C017833.2/MELO3C018066.2	2	down
ko04144	Endocytosis	17/708	173/4875	0.68	0.975676	0.912801	MELO3C002676.2/MELO3C003119.2/MELO3C005328.2/MELO3C005579.2/MELO3C007039.2/MELO3C011336.2/MELO3C014016.2/MELO3C017683.2/MELO3C017887.2/MELO3C018195.2/MELO3C019318.2/MELO3C020811.2/MELO3C021648.2/MELO3C021658.2/MELO3C022135.2/MELO3C022500.2/MELO3C025885.2	17	up&down
ko03015	mRNA surveillance pathway	9/708	109/4875	0.57	0.983878	0.912801	MELO3C008991.2/MELO3C011126.2/MELO3C015113.2/MELO3C019922.2/MELO3C023523.2/MELO3C024028.2/MELO3C024435.2/MELO3C024478.2/MELO3C025991.2	9	up&down
ko03013	RNA transport	13/708	147/4875	0.61	0.986753	0.912801	MELO3C000424.2/MELO3C002819.2/MELO3C002878.2/MELO3C005412.2/MELO3C006548.2/MELO3C007099.2/MELO3C007816.2/MELO3C022510.2/MELO3C023523.2/MELO3C024028.2/MELO3C026612.2/MELO3C029467.2/MELO3C030447.2	13	up&down
ko03022	Basal transcription factors	2/708	41/4875	0.34	0.987462	0.912801	MELO3C018875.2/MELO3C019179.2	2	up&down
ko00500	Starch and sucrose metabolism	27/708	268/4875	0.69	0.989364	0.912801	MELO3C002122.2/MELO3C005751.2/MELO3C006812.2/MELO3C007197.2/MELO3C008101.2/MELO3C010186.2/MELO3C011362.2/MELO3C012010.2/MELO3C012316.2/MELO3C013887.2/MELO3C013969.2/MELO3C014105.2/MELO3C014574.2/MELO3C015130.2/MELO3C015169.2/MELO3C015419.2/MELO3C016635.2/MELO3C017104.2/MELO3C017588.2/MELO3C018149.2/MELO3C018715.2/MELO3C021412.2/MELO3C022452.2/MELO3C025427.2/MELO3C026609.2/MELO3C027408.2/MELO3C030…	27	up&down
ko03020	RNA polymerase	4/708	66/4875	0.42	0.990858	0.912801	MELO3C007348.2/MELO3C013741.2/MELO3C017579.2/MELO3C021758.2	4	up&down
ko00970	Aminoacyl-tRNA biosynthesis	3/708	58/4875	0.36	0.993692	0.912801	MELO3C000039.2/MELO3C000756.2/MELO3C003472.2	3	up&down
ko00195	Photosynthesis	9/708	127/4875	0.49	0.99705	0.912801	MELO3C000399.2/MELO3C000428.2/MELO3C004388.2/MELO3C008060.2/MELO3C014124.2/MELO3C019895.2/MELO3C022393.2/MELO3C025587.2/MELO3C028553.2	9	up&down
ko00510	N-Glycan biosynthesis	1/708	38/4875	0.18	0.997491	0.912801	MELO3C021632.2	1	down
ko00190	Oxidative phosphorylation	12/708	189/4875	0.44	0.999889	0.912801	MELO3C002086.2/MELO3C003107.2/MELO3C006263.2/MELO3C006264.2/MELO3C006265.2/MELO3C011044.2/MELO3C015443.2/MELO3C017150.2/MELO3C021972.2/MELO3C022299.2/MELO3C024548.2/MELO3C028553.2	12	up&down
