# Supplementary material for: Transcriptomic analysis and physiological characteristics of exogenous naphthylacetic acid application to regulate the healing process of oriental melon grafted onto squash
Source: PeerJ. 2022 Sep 15;10:e13980. doi: 10.7717/peerj.13980 (PMC9482769; doi:10.7717/peerj.13980)
Supplement: Supplemental Information 10 [file peerj-10-13980-s010.xls]

## Sheet: KEGG_pathway_enrich_dotplot
ID	Description	GeneRatio	BgRatio	enrich_factor	pvalue	qvalue	geneID	Count	regulated
ko00280	Valine, leucine and isoleucine degradation	11/248	55/5449	4.39	2.8026e-05	0.00215358	CmoCh02G008790/CmoCh02G013280/CmoCh03G010860/CmoCh04G008490/CmoCh06G015100/CmoCh08G003230/CmoCh09G010800/CmoCh10G008330/CmoCh11G013680/CmoCh14G019240/CmoCh17G006590	11	down
ko04075	Plant hormone signal transduction	33/248	382/5449	1.9	0.000222793	0.00855993	CmoCh01G020220/CmoCh02G003380/CmoCh03G003400/CmoCh03G008650/CmoCh04G004950/CmoCh04G023970/CmoCh04G030170/CmoCh05G000700/CmoCh05G003790/CmoCh06G013340/CmoCh07G011240/CmoCh09G004620/CmoCh09G006100/CmoCh10G004370/CmoCh10G006330/CmoCh11G004020/CmoCh11G017180/CmoCh14G005280/CmoCh14G013260/CmoCh14G018460/CmoCh15G000390/CmoCh15G008650/CmoCh15G009250/CmoCh16G000680/CmoCh16G012080/CmoCh17G007330/CmoCh17G0…	33	up&down
ko00260	Glycine, serine and threonine metabolism	12/248	88/5449	3	0.000568164	0.014553	CmoCh02G013840/CmoCh03G008930/CmoCh03G011870/CmoCh04G008490/CmoCh07G005910/CmoCh08G006150/CmoCh09G005220/CmoCh11G009910/CmoCh14G012580/CmoCh17G006590/CmoCh18G007800/CmoCh20G001070	12	up&down
ko00500	Starch and sucrose metabolism	28/248	330/5449	1.86	0.000913403	0.0175469	CmoCh01G012190/CmoCh02G009180/CmoCh03G013370/CmoCh04G000840/CmoCh04G002980/CmoCh04G008650/CmoCh04G011120/CmoCh04G018000/CmoCh06G006860/CmoCh06G008520/CmoCh08G005440/CmoCh08G009750/CmoCh09G004510/CmoCh10G008210/CmoCh10G009950/CmoCh10G009990/CmoCh11G001070/CmoCh11G003320/CmoCh14G008490/CmoCh14G019020/CmoCh14G020280/CmoCh16G007450/CmoCh16G011440/CmoCh19G003000/CmoCh19G010380/CmoCh19G010390/CmoCh20G0…	28	up&down
ko00940	Phenylpropanoid biosynthesis	20/248	211/5449	2.08	0.00134805	0.0207174	CmoCh01G012190/CmoCh01G016130/CmoCh02G001590/CmoCh02G012510/CmoCh03G006870/CmoCh04G030950/CmoCh07G004030/CmoCh07G009480/CmoCh08G005440/CmoCh08G005780/CmoCh08G012530/CmoCh10G009950/CmoCh10G009990/CmoCh11G003320/CmoCh11G003950/CmoCh11G013620/CmoCh12G000350/CmoCh15G000760/CmoCh19G003030/CmoCh20G003420	20	up&down
ko00630	Glyoxylate and dicarboxylate metabolism	11/248	92/5449	2.63	0.00283594	0.03632	CmoCh01G003900/CmoCh03G008930/CmoCh03G009610/CmoCh07G005910/CmoCh08G006150/CmoCh13G008220/CmoCh14G008450/CmoCh14G017140/CmoCh18G007800/CmoCh20G001070/CmoCh20G006140	11	up&down
ko00460	Cyanoamino acid metabolism	8/248	63/5449	2.79	0.00726808	0.0797849	CmoCh01G012190/CmoCh03G008930/CmoCh03G009610/CmoCh07G005910/CmoCh08G005440/CmoCh10G009950/CmoCh10G009990/CmoCh11G003320	8	up&down
ko00250	Alanine, aspartate and glutamate metabolism	8/248	75/5449	2.34	0.0198694	0.190673	CmoCh01G003900/CmoCh04G006590/CmoCh04G008490/CmoCh14G008450/CmoCh14G017140/CmoCh18G007800/CmoCh20G001070/CmoCh20G003640	8	up&down
ko00220	Arginine biosynthesis	6/248	50/5449	2.64	0.0248136	0.190673	CmoCh01G003900/CmoCh01G019820/CmoCh02G016490/CmoCh14G008450/CmoCh14G017140/CmoCh18G007800	6	up&down
ko00910	Nitrogen metabolism	6/248	50/5449	2.64	0.0248136	0.190673	CmoCh01G003900/CmoCh03G009610/CmoCh09G006480/CmoCh12G001500/CmoCh14G008450/CmoCh14G017140	6	up&down
ko00071	Fatty acid degradation	6/248	52/5449	2.54	0.0294992	0.206071	CmoCh01G010340/CmoCh05G010180/CmoCh09G010960/CmoCh14G019240/CmoCh15G013480/CmoCh17G006590	6	up&down
ko04626	Plant-pathogen interaction	13/248	162/5449	1.76	0.0324035	0.207496	CmoCh01G007370/CmoCh02G005640/CmoCh02G007110/CmoCh06G001720/CmoCh06G013700/CmoCh07G013630/CmoCh09G001730/CmoCh13G000170/CmoCh14G000290/CmoCh14G021680/CmoCh16G001050/CmoCh17G008450/CmoCh17G012410	13	up&down
ko00730	Thiamine metabolism	3/248	17/5449	3.88	0.0394742	0.233329	CmoCh01G006860/CmoCh04G010110/CmoCh16G009100	3	up
ko01200	Carbon metabolism	22/248	329/5449	1.47	0.0430056	0.236046	CmoCh01G015120/CmoCh02G008030/CmoCh02G010200/CmoCh02G013840/CmoCh02G016370/CmoCh03G008930/CmoCh03G009610/CmoCh03G011870/CmoCh04G008890/CmoCh05G006080/CmoCh05G010180/CmoCh07G005910/CmoCh08G006150/CmoCh13G008220/CmoCh14G002730/CmoCh14G012580/CmoCh14G013270/CmoCh15G014980/CmoCh18G007800/CmoCh20G001020/CmoCh20G001070/CmoCh20G006140	22	up&down
ko00908	Zeatin biosynthesis	4/248	31/5449	2.84	0.0502074	0.257203	CmoCh05G002730/CmoCh06G014410/CmoCh07G013780/CmoCh17G002590	4	up&down
ko00945	Stilbenoid, diarylheptanoid and gingerol biosynthesis	3/248	20/5449	3.3	0.0599201	0.275245	CmoCh08G005780/CmoCh11G013620/CmoCh12G000350	3	up&down
ko00565	Ether lipid metabolism	4/248	33/5449	2.66	0.0608932	0.275245	CmoCh05G002360/CmoCh05G003310/CmoCh06G011420/CmoCh11G000300	4	up&down
ko00592	alpha-Linolenic acid metabolism	5/248	49/5449	2.24	0.0703187	0.298886	CmoCh01G010340/CmoCh09G010960/CmoCh14G019240/CmoCh19G006540/CmoCh20G000660	5	down
ko00051	Fructose and mannose metabolism	6/248	65/5449	2.03	0.0739027	0.298886	CmoCh01G019830/CmoCh02G008030/CmoCh12G010170/CmoCh14G002730/CmoCh15G009560/CmoCh20G001020	6	up&down
ko00380	Tryptophan metabolism	5/248	52/5449	2.11	0.086062	0.330659	CmoCh11G000800/CmoCh12G002190/CmoCh17G006590/CmoCh18G001690/CmoCh18G001750	5	up&down
ko04146	Peroxisome	8/248	102/5449	1.72	0.0918872	0.33191	CmoCh02G013280/CmoCh04G023440/CmoCh06G016940/CmoCh09G005220/CmoCh14G019240/CmoCh15G013480/CmoCh16G008550/CmoCh20G001070	8	up&down
ko00620	Pyruvate metabolism	8/248	103/5449	1.71	0.0959265	0.33191	CmoCh01G015120/CmoCh04G008890/CmoCh05G006080/CmoCh13G008220/CmoCh14G013270/CmoCh15G014980/CmoCh16G009340/CmoCh17G006590	8	up&down
ko00740	Riboflavin metabolism	2/248	12/5449	3.66	0.100852	0.33191	CmoCh14G004180/CmoCh15G009520	2	down
ko00710	Carbon fixation in photosynthetic organisms	8/248	105/5449	1.67	0.104304	0.33191	CmoCh01G015120/CmoCh02G008030/CmoCh04G008890/CmoCh05G006080/CmoCh14G002730/CmoCh14G013270/CmoCh15G014980/CmoCh18G007800	8	up&down
ko00052	Galactose metabolism	5/248	56/5449	1.96	0.109668	0.33191	CmoCh01G010890/CmoCh04G007280/CmoCh09G010460/CmoCh14G008490/CmoCh20G001020	5	up&down
ko00941	Flavonoid biosynthesis	3/248	26/5449	2.54	0.112304	0.33191	CmoCh08G005780/CmoCh11G013620/CmoCh12G000350	3	up&down
ko00010	Glycolysis / Gluconeogenesis	10/248	145/5449	1.52	0.123362	0.351089	CmoCh01G010340/CmoCh01G015120/CmoCh02G008030/CmoCh02G013840/CmoCh04G008890/CmoCh05G010180/CmoCh09G010960/CmoCh14G002730/CmoCh17G006590/CmoCh20G001020	10	up&down
ko01230	Biosynthesis of amino acids	17/248	279/5449	1.34	0.132533	0.363717	CmoCh01G003900/CmoCh01G019820/CmoCh02G008030/CmoCh02G013840/CmoCh02G016370/CmoCh02G016490/CmoCh03G008930/CmoCh03G011870/CmoCh07G005910/CmoCh11G009910/CmoCh13G002930/CmoCh14G002730/CmoCh14G008450/CmoCh14G012580/CmoCh14G017140/CmoCh17G006590/CmoCh18G007800	17	up&down
ko00640	Propanoate metabolism	4/248	46/5449	1.91	0.15532	0.411555	CmoCh03G010860/CmoCh06G015100/CmoCh09G010800/CmoCh10G008330	4	down
ko00310	Lysine degradation	3/248	33/5449	2	0.188209	0.48208	CmoCh09G005220/CmoCh10G008250/CmoCh17G006590	3	down
ko01040	Biosynthesis of unsaturated fatty acids	3/248	34/5449	1.94	0.199973	0.488424	CmoCh04G019000/CmoCh14G019240/CmoCh15G006330	3	up&down
ko00480	Glutathione metabolism	6/248	87/5449	1.52	0.203399	0.488424	CmoCh05G010600/CmoCh06G003370/CmoCh06G003380/CmoCh07G010720/CmoCh07G010750/CmoCh10G001400	6	up&down
ko00350	Tyrosine metabolism	4/248	52/5449	1.69	0.210517	0.4902	CmoCh01G010340/CmoCh01G013720/CmoCh05G010180/CmoCh09G010960	4	up&down
ko00040	Pentose and glucuronate interconversions	10/248	173/5449	1.27	0.262209	0.58098	CmoCh02G017420/CmoCh05G000620/CmoCh12G010170/CmoCh13G007990/CmoCh14G008490/CmoCh14G020280/CmoCh18G001800/CmoCh18G009150/CmoCh19G010380/CmoCh19G010390	10	up&down
ko00670	One carbon pool by folate	2/248	22/5449	2	0.264624	0.58098	CmoCh03G008930/CmoCh07G005910	2	up
ko00591	Linoleic acid metabolism	2/248	24/5449	1.83	0.298929	0.638064	CmoCh13G001100/CmoCh20G000660	2	down
ko00072	Synthesis and degradation of ketone bodies	1/248	8/5449	2.75	0.311262	0.646434	CmoCh02G013280	1	down
ko00906	Carotenoid biosynthesis	3/248	44/5449	1.5	0.323937	0.655052	CmoCh03G013970/CmoCh11G013610/CmoCh16G005530	3	up&down
ko00196	Photosynthesis - antenna proteins	2/248	26/5449	1.69	0.332973	0.65606	CmoCh04G027050/CmoCh15G006090	2	up
ko00360	Phenylalanine metabolism	4/248	65/5449	1.35	0.343052	0.659021	CmoCh01G013720/CmoCh07G009480/CmoCh11G003950/CmoCh11G013620	4	down
ko00561	Glycerolipid metabolism	4/248	67/5449	1.31	0.36405	0.670598	CmoCh08G004740/CmoCh08G006150/CmoCh17G006590/CmoCh17G008450	4	down
ko00650	Butanoate metabolism	2/248	28/5449	1.57	0.366533	0.670598	CmoCh02G013280/CmoCh04G006590	2	down
ko00564	Glycerophospholipid metabolism	6/248	111/5449	1.19	0.393341	0.682128	CmoCh05G002360/CmoCh05G003310/CmoCh06G011420/CmoCh08G004740/CmoCh11G000300/CmoCh11G003170	6	up&down
ko00330	Arginine and proline metabolism	4/248	70/5449	1.26	0.395484	0.682128	CmoCh01G013800/CmoCh04G029620/CmoCh10G001400/CmoCh17G006590	4	down
ko00410	beta-Alanine metabolism	3/248	50/5449	1.32	0.399466	0.682128	CmoCh01G013800/CmoCh10G001400/CmoCh17G006590	3	down
ko00520	Amino sugar and nucleotide sugar metabolism	8/248	161/5449	1.09	0.451727	0.75193	CmoCh03G006570/CmoCh04G007280/CmoCh14G004900/CmoCh14G008490/CmoCh15G009560/CmoCh16G007830/CmoCh19G003000/CmoCh20G001020	8	up&down
ko00073	Cutin, suberine and wax biosynthesis	2/248	35/5449	1.26	0.477847	0.75193	CmoCh01G017030/CmoCh04G000680	2	up
ko00300	Lysine biosynthesis	1/248	14/5449	1.57	0.479484	0.75193	CmoCh17G006590	1	down
ko00905	Brassinosteroid biosynthesis	1/248	14/5449	1.57	0.479484	0.75193	CmoCh04G029400	1	up
ko03008	Ribosome biogenesis in eukaryotes	4/248	82/5449	1.07	0.517164	0.7948	CmoCh10G006160/CmoCh11G005540/CmoCh11G009290/CmoCh11G012960	4	up&down
ko00030	Pentose phosphate pathway	3/248	64/5449	1.03	0.563114	0.797667	CmoCh02G010200/CmoCh02G016370/CmoCh14G002730	3	up&down
ko00062	Fatty acid elongation	2/248	41/5449	1.07	0.563263	0.797667	CmoCh04G019000/CmoCh06G013640	2	up&down
ko00904	Diterpenoid biosynthesis	2/248	41/5449	1.07	0.563263	0.797667	CmoCh07G001060/CmoCh13G005660	2	up&down
ko00590	Arachidonic acid metabolism	1/248	18/5449	1.22	0.568205	0.797667	CmoCh04G027270	1	up
ko00340	Histidine metabolism	1/248	19/5449	1.16	0.587922	0.797667	CmoCh17G006590	1	down
ko04140	Regulation of autophagy	2/248	43/5449	1.02	0.589432	0.797667	CmoCh09G004190/CmoCh14G010720	2	up
ko00562	Inositol phosphate metabolism	4/248	91/5449	0.97	0.600501	0.797667	CmoCh02G008030/CmoCh10G007130/CmoCh11G000300/CmoCh13G000560	4	up&down
ko04130	SNARE interactions in vesicular transport	2/248	44/5449	1	0.602075	0.797667	CmoCh06G005300/CmoCh13G006950	2	down
ko01212	Fatty acid metabolism	4/248	94/5449	0.93	0.626298	0.802329	CmoCh04G019000/CmoCh14G019240/CmoCh15G006330/CmoCh15G013480	4	up&down
ko00510	N-Glycan biosynthesis	2/248	46/5449	0.96	0.626476	0.802329	CmoCh15G003730/CmoCh18G007670	2	down
ko00053	Ascorbate and aldarate metabolism	2/248	48/5449	0.92	0.649705	0.818438	CmoCh10G007130/CmoCh17G006590	2	down
ko00290	Valine, leucine and isoleucine biosynthesis	1/248	24/5449	0.92	0.673841	0.832317	CmoCh03G011870	1	down
ko00130	Ubiquinone and other terpenoid-quinone biosynthesis	2/248	51/5449	0.86	0.682386	0.832317	CmoCh01G013720/CmoCh11G003950	2	down
ko00240	Pyrimidine metabolism	5/248	128/5449	0.86	0.700006	0.840467	CmoCh07G008150/CmoCh08G009410/CmoCh09G012480/CmoCh14G005390/CmoCh19G011570	5	up&down
ko00061	Fatty acid biosynthesis	2/248	57/5449	0.77	0.740266	0.863779	CmoCh15G006330/CmoCh15G013480	2	down
ko02010	ABC transporters	1/248	29/5449	0.76	0.741903	0.863779	CmoCh03G000570	1	down
ko00270	Cysteine and methionine metabolism	4/248	115/5449	0.76	0.775908	0.883018	CmoCh03G005880/CmoCh04G008490/CmoCh07G003260/CmoCh10G001400	4	up&down
ko00860	Porphyrin and chlorophyll metabolism	2/248	62/5449	0.71	0.78141	0.883018	CmoCh04G001120/CmoCh11G006180	2	down
ko00195	Photosynthesis	3/248	92/5449	0.72	0.797252	0.883242	CmoCh04G024700/CmoCh05G008690/CmoCh17G013240	3	up&down
ko00100	Steroid biosynthesis	1/248	35/5449	0.63	0.805159	0.883242	CmoCh14G002600	1	up
ko00020	Citrate cycle (TCA cycle)	2/248	69/5449	0.64	0.829391	0.883242	CmoCh01G015120/CmoCh04G008890	2	down
ko01210	2-Oxocarboxylic acid metabolism	2/248	69/5449	0.64	0.829391	0.883242	CmoCh02G016490/CmoCh18G007800	2	up&down
ko00920	Sulfur metabolism	1/248	44/5449	0.5	0.872278	0.883242	CmoCh18G003230	1	down
ko03018	RNA degradation	3/248	109/5449	0.6	0.880403	0.883242	CmoCh02G013510/CmoCh14G005390/CmoCh18G006810	3	down
ko04712	Circadian rhythm - plant	1/248	46/5449	0.48	0.88373	0.883242	CmoCh04G025770	1	up
ko00230	Purine metabolism	5/248	169/5449	0.65	0.890724	0.883242	CmoCh02G016370/CmoCh09G012480/CmoCh14G002060/CmoCh14G004180/CmoCh14G005390	5	up&down
ko00400	Phenylalanine, tyrosine and tryptophan biosynthesis	1/248	54/5449	0.41	0.920181	0.883242	CmoCh13G002930	1	down
ko03030	DNA replication	1/248	55/5449	0.4	0.92385	0.883242	CmoCh09G012480	1	up
ko03420	Nucleotide excision repair	1/248	71/5449	0.31	0.964178	0.883242	CmoCh20G003750	1	up
ko04144	Endocytosis	5/248	218/5449	0.5	0.974084	0.883242	CmoCh01G020410/CmoCh05G000120/CmoCh05G003310/CmoCh06G017030/CmoCh07G000370	5	up&down
ko04141	Protein processing in endoplasmic reticulum	5/248	220/5449	0.5	0.975665	0.883242	CmoCh06G002650/CmoCh09G008610/CmoCh11G019510/CmoCh16G001050/CmoCh19G010200	5	up&down
ko04120	Ubiquitin mediated proteolysis	2/248	123/5449	0.36	0.978708	0.883242	CmoCh09G004920/CmoCh20G003750	2	up&down
ko00190	Oxidative phosphorylation	3/248	179/5449	0.37	0.989937	0.883242	CmoCh03G004530/CmoCh10G007270/CmoCh14G003020	3	up&down
ko03015	mRNA surveillance pathway	1/248	137/5449	0.16	0.998442	0.883242	CmoCh03G012000	1	down
ko03013	RNA transport	2/248	198/5449	0.22	0.999104	0.883242	CmoCh10G006160/CmoCh11G005540	2	up
ko03040	Spliceosome	1/248	215/5449	0.1	0.999964	0.883242	CmoCh13G011210	1	up
ko03010	Ribosome	2/248	350/5449	0.13	0.999999	0.883242	CmoCh01G002480/CmoCh01G013880	2	up&down
