# Supplementary material for: Transcriptomic analysis and physiological characteristics of exogenous naphthylacetic acid application to regulate the healing process of oriental melon grafted onto squash
Source: PeerJ. 2022 Sep 15;10:e13980. doi: 10.7717/peerj.13980 (PMC9482769; doi:10.7717/peerj.13980)
Supplement: Supplemental Information 11 [file peerj-10-13980-s011.xls]

## Sheet: KEGG_pathway_enrich_dotplot
ID	Description	GeneRatio	BgRatio	enrich_factor	pvalue	qvalue	geneID	Count	regulated
ko00909	Sesquiterpenoid and triterpenoid biosynthesis	4/99	16/4875	12.31	0.000241482	0.0142347	MELO3C001812.2/MELO3C002943.2/MELO3C016845.2/MELO3C022374.2	4	up&down
ko00940	Phenylpropanoid biosynthesis	10/99	169/4875	2.91	0.00207831	0.0612556	MELO3C006862.2/MELO3C007545.2/MELO3C007618.2/MELO3C011430.2/MELO3C014227.2/MELO3C014229.2/MELO3C018247.2/MELO3C019239.2/MELO3C021914.2/MELO3C023474.2	10	up&down
ko04075	Plant hormone signal transduction	12/99	282/4875	2.1	0.0111426	0.218942	MELO3C003299.2/MELO3C003696.2/MELO3C003768.2/MELO3C005991.2/MELO3C007893.2/MELO3C010317.2/MELO3C015762.2/MELO3C020763.2/MELO3C020766.2/MELO3C020767.2/MELO3C021427.2/MELO3C026019.2	12	up&down
ko04626	Plant-pathogen interaction	7/99	134/4875	2.57	0.018506	0.27272	MELO3C000592.2/MELO3C005719.2/MELO3C006031.2/MELO3C022777.2/MELO3C025781.2/MELO3C027461.2/MELO3C029753.2	7	down
ko00630	Glyoxylate and dicarboxylate metabolism	5/99	82/4875	3	0.0248554	0.293032	MELO3C001462.2/MELO3C003386.2/MELO3C006166.2/MELO3C022683.2/MELO3C022828.2	5	up&down
ko00591	Linoleic acid metabolism	3/99	35/4875	4.22	0.0332513	0.326679	MELO3C004252.2/MELO3C014630.2/MELO3C027169.2	3	down
ko00500	Starch and sucrose metabolism	10/99	268/4875	1.84	0.0441468	0.371762	MELO3C006812.2/MELO3C011430.2/MELO3C015288.2/MELO3C017931.2/MELO3C018247.2/MELO3C022160.2/MELO3C023310.2/MELO3C024306.2/MELO3C027408.2/MELO3C031057.2	10	up&down
ko00040	Pentose and glucuronate interconversions	6/99	135/4875	2.19	0.0555897	0.409608	MELO3C002319.2/MELO3C014601.2/MELO3C015288.2/MELO3C024306.2/MELO3C027408.2/MELO3C031057.2	6	up&down
ko02010	ABC transporters	2/99	22/4875	4.48	0.0724951	0.474822	MELO3C001110.2/MELO3C003428.2	2	down
ko00062	Fatty acid elongation	2/99	25/4875	3.94	0.0905722	0.531252	MELO3C012246.2/MELO3C016930.2	2	down
ko00330	Arginine and proline metabolism	3/99	57/4875	2.59	0.10853	0.531252	MELO3C004110.2/MELO3C014601.2/MELO3C020793.2	3	up&down
ko00260	Glycine, serine and threonine metabolism	4/99	90/4875	2.19	0.109396	0.531252	MELO3C001462.2/MELO3C003386.2/MELO3C006166.2/MELO3C017520.2	4	up&down
ko00460	Cyanoamino acid metabolism	3/99	60/4875	2.46	0.121667	0.531252	MELO3C004061.2/MELO3C011430.2/MELO3C018247.2	3	up&down
ko00360	Phenylalanine metabolism	3/99	61/4875	2.42	0.126172	0.531252	MELO3C014227.2/MELO3C014229.2/MELO3C020793.2	3	down
ko00906	Carotenoid biosynthesis	2/99	34/4875	2.9	0.15097	0.582489	MELO3C027057.2/MELO3C035278.2	2	down
ko00910	Nitrogen metabolism	2/99	35/4875	2.81	0.158104	0.582489	MELO3C008481.2/MELO3C022828.2	2	up&down
ko00380	Tryptophan metabolism	2/99	39/4875	2.53	0.187215	0.642387	MELO3C014601.2/MELO3C020793.2	2	down
ko00740	Riboflavin metabolism	1/99	11/4875	4.48	0.202217	0.642387	MELO3C024827.2	1	down
ko00710	Carbon fixation in photosynthetic organisms	3/99	79/4875	1.87	0.215793	0.642387	MELO3C001462.2/MELO3C025636.2/MELO3C029774.2	3	down
ko00053	Ascorbate and aldarate metabolism	2/99	45/4875	2.19	0.232062	0.642387	MELO3C014601.2/MELO3C015430.2	2	up&down
ko00220	Arginine biosynthesis	2/99	46/4875	2.14	0.239618	0.642387	MELO3C001462.2/MELO3C022828.2	2	up&down
ko00250	Alanine, aspartate and glutamate metabolism	3/99	85/4875	1.74	0.248235	0.642387	MELO3C001462.2/MELO3C008481.2/MELO3C022828.2	3	up&down
ko00520	Amino sugar and nucleotide sugar metabolism	4/99	127/4875	1.55	0.257208	0.642387	MELO3C010249.2/MELO3C017931.2/MELO3C023310.2/MELO3C026303.2	4	up&down
ko00270	Cysteine and methionine metabolism	3/99	92/4875	1.61	0.286951	0.642387	MELO3C004110.2/MELO3C006291.2/MELO3C024471.2	3	up&down
ko00760	Nicotinate and nicotinamide metabolism	1/99	17/4875	2.9	0.294864	0.642387	MELO3C024536.2	1	up
ko00945	Stilbenoid, diarylheptanoid and gingerol biosynthesis	1/99	17/4875	2.9	0.294864	0.642387	MELO3C023474.2	1	down
ko00340	Histidine metabolism	1/99	18/4875	2.74	0.309233	0.642387	MELO3C014601.2	1	down
ko00730	Thiamine metabolism	1/99	18/4875	2.74	0.309233	0.642387	MELO3C022605.2	1	up
ko00051	Fructose and mannose metabolism	2/99	58/4875	1.7	0.330349	0.642387	MELO3C019796.2/MELO3C022162.2	2	down
ko00561	Glycerolipid metabolism	2/99	58/4875	1.7	0.330349	0.642387	MELO3C014601.2/MELO3C015908.2	2	down
ko00052	Galactose metabolism	2/99	59/4875	1.67	0.337827	0.642387	MELO3C012925.2/MELO3C025521.2	2	down
ko00310	Lysine degradation	1/99	21/4875	2.34	0.350626	0.64589	MELO3C014601.2	1	down
ko00620	Pyruvate metabolism	3/99	110/4875	1.34	0.387635	0.675402	MELO3C014601.2/MELO3C025636.2/MELO3C029774.2	3	down
ko00941	Flavonoid biosynthesis	1/99	24/4875	2.05	0.389562	0.675402	MELO3C023474.2	1	down
ko00073	Cutin, suberine and wax biosynthesis	1/99	27/4875	1.82	0.426186	0.711907	MELO3C016974.2	1	up
ko01230	Biosynthesis of amino acids	6/99	260/4875	1.14	0.434772	0.711907	MELO3C001462.2/MELO3C008481.2/MELO3C017520.2/MELO3C020958.2/MELO3C022828.2/MELO3C024471.2	6	up&down
ko00100	Steroid biosynthesis	1/99	30/4875	1.64	0.460633	0.72798	MELO3C016845.2	1	up
ko04144	Endocytosis	4/99	173/4875	1.14	0.469287	0.72798	MELO3C004216.2/MELO3C007312.2/MELO3C007583.2/MELO3C023851.2	4	up
ko00071	Fatty acid degradation	1/99	37/4875	1.33	0.533252	0.792602	MELO3C014601.2	1	down
ko00564	Glycerophospholipid metabolism	2/99	88/4875	1.12	0.537837	0.792602	MELO3C015908.2/MELO3C029740.2	2	down
ko03410	Base excision repair	1/99	40/4875	1.23	0.561328	0.793885	MELO3C019611.2	1	up
ko03022	Basal transcription factors	1/99	41/4875	1.2	0.57031	0.793885	MELO3C018875.2	1	up
ko00410	beta-Alanine metabolism	1/99	42/4875	1.17	0.57911	0.793885	MELO3C014601.2	1	down
ko00280	Valine, leucine and isoleucine degradation	1/99	44/4875	1.12	0.596179	0.798708	MELO3C014601.2	1	down
ko00400	Phenylalanine, tyrosine and tryptophan biosynthesis	1/99	49/4875	1	0.63591	0.833005	MELO3C020958.2	1	up
ko00900	Terpenoid backbone biosynthesis	1/99	55/4875	0.9	0.678508	0.8396	MELO3C015691.2	1	down
ko00592	alpha-Linolenic acid metabolism	1/99	57/4875	0.86	0.69158	0.8396	MELO3C014630.2	1	down
ko00970	Aminoacyl-tRNA biosynthesis	1/99	58/4875	0.85	0.697918	0.8396	MELO3C024031.2	1	down
ko01210	2-Oxocarboxylic acid metabolism	1/99	58/4875	0.85	0.697918	0.8396	MELO3C001462.2	1	down
ko01200	Carbon metabolism	5/99	296/4875	0.83	0.727545	0.841123	MELO3C001462.2/MELO3C006166.2/MELO3C022683.2/MELO3C025636.2/MELO3C029774.2	5	up&down
ko00562	Inositol phosphate metabolism	1/99	63/4875	0.78	0.727722	0.841123	MELO3C015430.2	1	up
ko04145	Phagosome	1/99	71/4875	0.69	0.769466	0.870582	MELO3C005673.2	1	up
ko04141	Protein processing in endoplasmic reticulum	3/99	201/4875	0.73	0.782746	0.870582	MELO3C000592.2/MELO3C014827.2/MELO3C027461.2	3	up&down
ko03013	RNA transport	2/99	147/4875	0.67	0.806226	0.880091	MELO3C000249.2/MELO3C000424.2	2	down
ko04146	Peroxisome	1/99	85/4875	0.58	0.827831	0.887245	MELO3C022683.2	1	up
ko00480	Glutathione metabolism	1/99	94/4875	0.52	0.857356	0.90248	MELO3C032562.2	1	down
ko04120	Ubiquitin mediated proteolysis	1/99	108/4875	0.46	0.893621	0.920189	MELO3C007283.2	1	down
ko03040	Spliceosome	2/99	194/4875	0.51	0.910648	0.920189	Cucumis_melo_newGene_1102/MELO3C006732.2	2	up&down
ko00195	Photosynthesis	1/99	127/4875	0.39	0.928657	0.920189	MELO3C010608.2	1	down
ko00010	Glycolysis / Gluconeogenesis	1/99	142/4875	0.35	0.948015	0.920189	MELO3C014601.2	1	down
ko00240	Pyrimidine metabolism	1/99	146/4875	0.34	0.952231	0.920189	MELO3C024536.2	1	up
ko00190	Oxidative phosphorylation	1/99	189/4875	0.26	0.980846	0.932553	MELO3C022299.2	1	up
ko03010	Ribosome	1/99	371/4875	0.13	0.999636	0.935332	MELO3C006255.2	1	up
