# Supplementary material for: Transcriptomic analysis and physiological characteristics of exogenous naphthylacetic acid application to regulate the healing process of oriental melon grafted onto squash
Source: PeerJ. 2022 Sep 15;10:e13980. doi: 10.7717/peerj.13980 (PMC9482769; doi:10.7717/peerj.13980)
Supplement: Supplemental Information 12 [file peerj-10-13980-s012.xls]

## Sheet: KEGG_pathway_enrich_dotplot
ID	Description	GeneRatio	BgRatio	enrich_factor	pvalue	qvalue	geneID	Count	regulated
ko00940	Phenylpropanoid biosynthesis	45/405	211/5449	2.87	3.77e-11	3.49e-09	CmoCh00G001520/CmoCh01G001900/CmoCh01G002070/CmoCh01G007480/CmoCh01G012190/CmoCh01G020440/CmoCh02G001590/CmoCh02G006920/CmoCh02G012490/CmoCh02G012520/CmoCh03G006880/CmoCh03G012270/CmoCh03G012280/CmoCh03G012290/CmoCh04G005010/CmoCh05G006990/CmoCh07G004030/CmoCh07G009470/CmoCh07G009480/CmoCh07G009490/CmoCh07G009500/CmoCh07G009510/CmoCh07G009530/CmoCh07G009550/CmoCh07G009560/CmoCh08G005430/CmoCh08G0…	45	up&down
ko00360	Phenylalanine metabolism	20/405	65/5449	4.14	2.07e-08	9.61e-07	CmoCh01G002070/CmoCh02G000900/CmoCh02G006920/CmoCh03G012270/CmoCh03G012280/CmoCh03G012290/CmoCh05G006990/CmoCh07G009470/CmoCh07G009480/CmoCh07G009490/CmoCh07G009500/CmoCh07G009510/CmoCh07G009530/CmoCh07G009550/CmoCh07G009560/CmoCh14G010570/CmoCh17G008870/CmoCh18G006920/CmoCh19G006220/CmoCh20G005320	20	up&down
ko01230	Biosynthesis of amino acids	36/405	279/5449	1.74	0.000667427	0.018143	CmoCh01G003900/CmoCh01G003910/CmoCh02G000900/CmoCh03G001720/CmoCh03G008600/CmoCh03G008930/CmoCh04G000780/CmoCh04G022010/CmoCh05G001190/CmoCh05G012050/CmoCh06G009380/CmoCh06G014450/CmoCh07G005550/CmoCh07G005910/CmoCh07G009000/CmoCh07G009070/CmoCh08G009670/CmoCh11G002460/CmoCh12G001140/CmoCh12G009710/CmoCh13G002930/CmoCh14G004800/CmoCh14G005310/CmoCh14G008450/CmoCh14G011220/CmoCh14G012580/CmoCh14G0…	36	up&down
ko00073	Cutin, suberine and wax biosynthesis	9/405	35/5449	3.46	0.000783448	0.018143	CmoCh01G006870/CmoCh02G013720/CmoCh08G007390/CmoCh08G009430/CmoCh10G000390/CmoCh11G000210/CmoCh13G000690/CmoCh17G001430/CmoCh17G004150	9	up&down
ko00460	Cyanoamino acid metabolism	12/405	63/5449	2.56	0.0019835	0.0339491	CmoCh01G012190/CmoCh03G008930/CmoCh03G009610/CmoCh07G005910/CmoCh08G005430/CmoCh08G009670/CmoCh10G009930/CmoCh10G009940/CmoCh10G009950/CmoCh12G010200/CmoCh14G011070/CmoCh17G000940	12	up&down
ko00941	Flavonoid biosynthesis	7/405	26/5449	3.62	0.002262	0.0339491	CmoCh02G006920/CmoCh12G000350/CmoCh14G005060/CmoCh15G004320/CmoCh17G008740/CmoCh18G006920/CmoCh19G006220	7	down
ko00945	Stilbenoid, diarylheptanoid and gingerol biosynthesis	6/405	20/5449	4.04	0.00256547	0.0339491	CmoCh02G006920/CmoCh12G000350/CmoCh14G005060/CmoCh17G008740/CmoCh18G006920/CmoCh19G006220	6	down
ko03030	DNA replication	10/405	55/5449	2.45	0.00650889	0.0753661	CmoCh02G005250/CmoCh07G004790/CmoCh07G008460/CmoCh08G004610/CmoCh09G012480/CmoCh11G002120/CmoCh14G010780/CmoCh14G020000/CmoCh17G010080/CmoCh20G004050	10	up&down
ko00062	Fatty acid elongation	8/405	41/5449	2.63	0.00940456	0.0965183	CmoCh01G017430/CmoCh02G008410/CmoCh04G015800/CmoCh06G013640/CmoCh09G003830/CmoCh12G000380/CmoCh14G018050/CmoCh18G010320	8	down
ko00196	Photosynthesis - antenna proteins	6/405	26/5449	3.1	0.0104196	0.0965183	CmoCh07G001300/CmoCh07G010930/CmoCh10G002120/CmoCh11G014910/CmoCh13G005730/CmoCh15G006090	6	up&down
ko00630	Glyoxylate and dicarboxylate metabolism	13/405	92/5449	1.9	0.0176482	0.144428	CmoCh01G003900/CmoCh01G003910/CmoCh03G008930/CmoCh03G009610/CmoCh06G014450/CmoCh07G005910/CmoCh08G009670/CmoCh13G008220/CmoCh14G008450/CmoCh14G012300/CmoCh14G017140/CmoCh17G000940/CmoCh20G006140	13	up&down
ko00280	Valine, leucine and isoleucine degradation	9/405	55/5449	2.2	0.0188446	0.144428	CmoCh02G008790/CmoCh02G012830/CmoCh02G017380/CmoCh03G003210/CmoCh03G010860/CmoCh05G001190/CmoCh06G015100/CmoCh08G003230/CmoCh16G007050	9	up&down
ko00670	One carbon pool by folate	5/405	22/5449	3.06	0.0202691	0.144428	CmoCh03G008930/CmoCh07G005910/CmoCh08G009670/CmoCh13G008750/CmoCh17G000940	5	down
ko00270	Cysteine and methionine metabolism	15/405	115/5449	1.75	0.0223255	0.147717	CmoCh02G000900/CmoCh03G003210/CmoCh04G000780/CmoCh05G001190/CmoCh05G010330/CmoCh05G012050/CmoCh06G005900/CmoCh06G006200/CmoCh06G009380/CmoCh08G011560/CmoCh11G020150/CmoCh14G004800/CmoCh14G005310/CmoCh14G011220/CmoCh17G000950	15	up&down
ko00561	Glycerolipid metabolism	10/405	67/5449	2.01	0.0249611	0.154146	CmoCh01G008600/CmoCh02G012830/CmoCh03G001730/CmoCh04G012450/CmoCh06G002310/CmoCh08G004740/CmoCh14G000730/CmoCh14G001640/CmoCh16G007050/CmoCh17G004140	10	up&down
ko00910	Nitrogen metabolism	8/405	50/5449	2.15	0.029518	0.170894	CmoCh01G003900/CmoCh01G003910/CmoCh03G009610/CmoCh06G014450/CmoCh12G001500/CmoCh14G008450/CmoCh14G017140/CmoCh16G000640	8	up&down
ko00130	Ubiquinone and other terpenoid-quinone biosynthesis	8/405	51/5449	2.11	0.0328298	0.178887	CmoCh01G002070/CmoCh02G000900/CmoCh02G006920/CmoCh03G005280/CmoCh05G006990/CmoCh11G014780/CmoCh14G010570/CmoCh17G008870	8	up&down
ko00071	Fatty acid degradation	8/405	52/5449	2.07	0.0363862	0.183	CmoCh01G002830/CmoCh01G010360/CmoCh02G009540/CmoCh02G012830/CmoCh02G017380/CmoCh08G012040/CmoCh16G005980/CmoCh16G007050	8	up&down
ko00860	Porphyrin and chlorophyll metabolism	9/405	62/5449	1.95	0.0381184	0.183	CmoCh01G012510/CmoCh03G000620/CmoCh03G002120/CmoCh03G013080/CmoCh09G008690/CmoCh10G002090/CmoCh10G006560/CmoCh10G009490/CmoCh14G010000	9	up&down
ko00010	Glycolysis / Gluconeogenesis	17/405	145/5449	1.58	0.0395114	0.183	CmoCh01G009700/CmoCh01G010360/CmoCh02G009540/CmoCh02G012830/CmoCh07G009000/CmoCh07G009070/CmoCh11G002460/CmoCh12G001140/CmoCh12G011750/CmoCh15G000950/CmoCh16G000890/CmoCh16G003210/CmoCh16G007050/CmoCh18G005500/CmoCh18G010400/CmoCh20G001020/CmoCh20G008150	17	up&down
ko00061	Fatty acid biosynthesis	8/405	57/5449	1.89	0.0580357	0.255997	CmoCh01G002830/CmoCh02G012560/CmoCh05G013360/CmoCh07G014140/CmoCh12G013670/CmoCh13G008490/CmoCh16G005980/CmoCh20G000610	8	down
ko00053	Ascorbate and aldarate metabolism	7/405	48/5449	1.96	0.0621954	0.261875	CmoCh01G016650/CmoCh02G012830/CmoCh09G005570/CmoCh10G007130/CmoCh11G008210/CmoCh12G013180/CmoCh16G007050	7	up&down
ko00450	Selenocompound metabolism	5/405	30/5449	2.24	0.0675761	0.27216	CmoCh02G013330/CmoCh06G005900/CmoCh06G009380/CmoCh14G005310/CmoCh14G011220	5	up&down
ko00620	Pyruvate metabolism	12/405	103/5449	1.57	0.0786111	0.303411	CmoCh01G009700/CmoCh02G012830/CmoCh05G006080/CmoCh07G009070/CmoCh07G014140/CmoCh09G008120/CmoCh13G008220/CmoCh15G014980/CmoCh16G000890/CmoCh16G003210/CmoCh16G007050/CmoCh18G010400	12	up&down
ko01212	Fatty acid metabolism	11/405	94/5449	1.57	0.0875059	0.324232	CmoCh01G002830/CmoCh02G012560/CmoCh02G017380/CmoCh05G013360/CmoCh07G014140/CmoCh08G012040/CmoCh12G000380/CmoCh12G013670/CmoCh13G008490/CmoCh16G005980/CmoCh20G000610	11	up&down
ko00909	Sesquiterpenoid and triterpenoid biosynthesis	3/405	15/5449	2.69	0.0951118	0.324303	CmoCh01G018190/CmoCh05G009440/CmoCh05G009500	3	up&down
ko01200	Carbon metabolism	31/405	329/5449	1.27	0.0976789	0.324303	CmoCh01G009700/CmoCh03G008930/CmoCh03G009610/CmoCh04G022010/CmoCh05G006080/CmoCh05G012050/CmoCh07G005910/CmoCh07G009000/CmoCh07G009070/CmoCh07G014140/CmoCh08G009670/CmoCh09G008120/CmoCh11G002460/CmoCh12G001140/CmoCh12G011750/CmoCh13G008220/CmoCh14G004800/CmoCh14G007950/CmoCh14G012300/CmoCh14G012580/CmoCh15G000950/CmoCh15G014980/CmoCh16G000890/CmoCh16G003210/CmoCh16G003670/CmoCh17G000940/CmoCh18G0…	31	up&down
ko00591	Linoleic acid metabolism	4/405	24/5449	2.24	0.0980278	0.324303	CmoCh03G001730/CmoCh05G011240/CmoCh08G007730/CmoCh13G001100	4	up&down
ko00250	Alanine, aspartate and glutamate metabolism	9/405	75/5449	1.61	0.10229	0.326733	CmoCh01G003900/CmoCh01G003910/CmoCh01G010880/CmoCh03G003210/CmoCh04G022550/CmoCh06G014450/CmoCh14G008450/CmoCh14G017140/CmoCh16G000640	9	up&down
ko00260	Glycine, serine and threonine metabolism	10/405	88/5449	1.53	0.115994	0.358155	CmoCh03G003210/CmoCh03G008930/CmoCh04G000780/CmoCh07G005910/CmoCh08G009670/CmoCh12G001140/CmoCh14G012580/CmoCh16G003670/CmoCh17G000940/CmoCh17G006810	10	up&down
ko04075	Plant hormone signal transduction	34/405	382/5449	1.2	0.150906	0.443694	CmoCh01G020170/CmoCh01G020630/CmoCh03G003400/CmoCh03G003670/CmoCh04G004950/CmoCh04G007210/CmoCh04G024810/CmoCh06G002290/CmoCh06G013340/CmoCh06G013570/CmoCh06G014530/CmoCh07G006010/CmoCh07G010990/CmoCh08G006140/CmoCh08G010620/CmoCh10G004370/CmoCh10G005160/CmoCh10G006960/CmoCh10G008090/CmoCh11G004020/CmoCh11G005830/CmoCh14G012240/CmoCh14G013260/CmoCh14G016980/CmoCh14G018090/CmoCh15G006810/CmoCh15G0…	34	up&down
ko00592	alpha-Linolenic acid metabolism	6/405	49/5449	1.65	0.153276	0.443694	CmoCh01G010360/CmoCh02G017380/CmoCh03G001730/CmoCh08G007730/CmoCh08G012040/CmoCh11G013280	6	up&down
ko02010	ABC transporters	4/405	29/5449	1.86	0.16494	0.462991	CmoCh01G001950/CmoCh04G028680/CmoCh04G028900/CmoCh19G002370	4	down
ko00500	Starch and sucrose metabolism	29/405	330/5449	1.18	0.19278	0.52522	CmoCh01G004930/CmoCh01G009100/CmoCh01G012190/CmoCh04G008650/CmoCh04G011120/CmoCh04G023740/CmoCh07G002900/CmoCh08G005430/CmoCh08G009680/CmoCh09G009630/CmoCh10G007030/CmoCh10G009930/CmoCh10G009940/CmoCh10G009950/CmoCh11G007680/CmoCh11G014970/CmoCh14G008490/CmoCh14G009300/CmoCh14G009470/CmoCh14G011070/CmoCh14G019020/CmoCh14G020280/CmoCh15G007690/CmoCh16G002050/CmoCh17G000880/CmoCh17G001260/CmoCh17G0…	29	up&down
ko00400	Phenylalanine, tyrosine and tryptophan biosynthesis	6/405	54/5449	1.49	0.20998	0.555738	CmoCh02G000900/CmoCh03G008600/CmoCh07G005550/CmoCh12G009710/CmoCh13G002930/CmoCh15G001450	6	up&down
ko00740	Riboflavin metabolism	2/405	12/5449	2.24	0.22272	0.573081	CmoCh04G004300/CmoCh12G000710	2	up&down
ko00780	Biotin metabolism	3/405	23/5449	1.75	0.241893	0.586833	CmoCh02G012560/CmoCh12G013670/CmoCh20G000610	3	down
ko00195	Photosynthesis	9/405	92/5449	1.32	0.242788	0.586833	CmoCh03G005600/CmoCh08G003070/CmoCh09G000810/CmoCh11G019450/CmoCh13G003810/CmoCh14G017480/CmoCh15G006930/CmoCh16G009880/CmoCh19G010120	9	down
ko00900	Terpenoid backbone biosynthesis	6/405	57/5449	1.42	0.24707	0.586833	CmoCh01G011030/CmoCh06G006270/CmoCh10G002090/CmoCh11G004130/CmoCh16G008160/CmoCh20G007030	6	down
ko00040	Pentose and glucuronate interconversions	15/405	173/5449	1.17	0.30384	0.703629	CmoCh02G012830/CmoCh04G027910/CmoCh06G012740/CmoCh07G002900/CmoCh07G009250/CmoCh10G007030/CmoCh13G007990/CmoCh14G008490/CmoCh14G019180/CmoCh14G020280/CmoCh16G007050/CmoCh17G010380/CmoCh18G001800/CmoCh18G007940/CmoCh19G001550	15	up&down
ko00220	Arginine biosynthesis	5/405	50/5449	1.35	0.31333	0.707908	CmoCh01G003900/CmoCh01G003910/CmoCh06G014450/CmoCh14G008450/CmoCh14G017140	5	down
ko00950	Isoquinoline alkaloid biosynthesis	3/405	27/5449	1.49	0.325052	0.716907	CmoCh02G000900/CmoCh13G006770/CmoCh19G001350	3	up&down
ko00350	Tyrosine metabolism	5/405	52/5449	1.29	0.343453	0.730653	CmoCh01G010360/CmoCh02G000900/CmoCh02G009540/CmoCh13G006770/CmoCh19G001350	5	up&down
ko00051	Fructose and mannose metabolism	6/405	65/5449	1.24	0.352922	0.730653	CmoCh01G019830/CmoCh07G009000/CmoCh15G009560/CmoCh18G005500/CmoCh20G001020/CmoCh20G008150	6	up&down
ko00730	Thiamine metabolism	2/405	17/5449	1.58	0.363872	0.730653	CmoCh01G006860/CmoCh11G004130	2	up&down
ko00604	Glycosphingolipid biosynthesis - ganglio series	1/405	6/5449	2.24	0.370996	0.730653	CmoCh05G007870	1	down
ko04145	Phagosome	8/405	92/5449	1.17	0.375816	0.730653	CmoCh01G009830/CmoCh05G010910/CmoCh07G006190/CmoCh07G010840/CmoCh11G014290/CmoCh12G010450/CmoCh14G000910/CmoCh14G011170	8	up&down
ko00710	Carbon fixation in photosynthetic organisms	9/405	105/5449	1.15	0.378611	0.730653	CmoCh04G022010/CmoCh05G006080/CmoCh07G009000/CmoCh09G008120/CmoCh14G007950/CmoCh15G000950/CmoCh15G014980/CmoCh19G002230/CmoCh20G008150	9	up&down
ko00340	Histidine metabolism	2/405	19/5449	1.42	0.418019	0.764729	CmoCh02G012830/CmoCh16G007050	2	down
ko00520	Amino sugar and nucleotide sugar metabolism	13/405	161/5449	1.09	0.419784	0.764729	CmoCh03G006570/CmoCh05G007870/CmoCh07G003850/CmoCh08G009680/CmoCh09G005310/CmoCh11G014970/CmoCh12G012470/CmoCh14G008490/CmoCh14G009300/CmoCh14G009470/CmoCh15G009560/CmoCh18G000220/CmoCh20G001020	13	up&down
ko00330	Arginine and proline metabolism	6/405	70/5449	1.15	0.421035	0.764729	CmoCh02G012830/CmoCh03G001720/CmoCh05G010330/CmoCh08G011560/CmoCh16G007050/CmoCh20G008120	6	up&down
ko00564	Glycerophospholipid metabolism	9/405	111/5449	1.09	0.443885	0.77127	CmoCh01G008600/CmoCh03G001730/CmoCh04G012450/CmoCh06G002310/CmoCh08G004740/CmoCh11G003170/CmoCh14G000730/CmoCh14G001640/CmoCh17G004140	9	up&down
ko03430	Mismatch repair	4/405	46/5449	1.17	0.449615	0.77127	CmoCh07G004790/CmoCh07G008460/CmoCh11G002120/CmoCh20G004050	4	up&down
ko04712	Circadian rhythm - plant	4/405	46/5449	1.17	0.449615	0.77127	CmoCh01G008410/CmoCh04G011030/CmoCh04G025770/CmoCh15G010550	4	up
ko00480	Glutathione metabolism	7/405	87/5449	1.08	0.471507	0.794116	CmoCh01G016650/CmoCh03G003940/CmoCh04G006870/CmoCh06G003370/CmoCh06G003380/CmoCh07G007980/CmoCh09G005570	7	down
ko00100	Steroid biosynthesis	3/405	35/5449	1.15	0.488187	0.807528	CmoCh01G018190/CmoCh03G001730/CmoCh09G000820	3	up
ko00030	Pentose phosphate pathway	5/405	64/5449	1.05	0.521993	0.8483	CmoCh04G022010/CmoCh07G009000/CmoCh12G011750/CmoCh18G005500/CmoCh20G008150	5	up&down
ko00603	Glycosphingolipid biosynthesis - globo series	1/405	10/5449	1.35	0.53837	0.857693	CmoCh05G007870	1	down
ko04626	Plant-pathogen interaction	12/405	162/5449	1	0.549394	0.857693	CmoCh01G003790/CmoCh01G016260/CmoCh03G002080/CmoCh05G003160/CmoCh06G017360/CmoCh11G003140/CmoCh12G003530/CmoCh14G000290/CmoCh14G000550/CmoCh14G010850/CmoCh14G018000/CmoCh19G005420	12	down
ko00511	Other glycan degradation	2/405	26/5449	1.03	0.586083	0.857693	CmoCh04G004990/CmoCh05G007870	2	down
ko00020	Citrate cycle (TCA cycle)	5/405	69/5449	0.97	0.590418	0.857693	CmoCh01G009700/CmoCh08G012430/CmoCh12G000160/CmoCh12G006030/CmoCh18G010400	5	down
ko00052	Galactose metabolism	4/405	56/5449	0.96	0.607085	0.857693	CmoCh08G004690/CmoCh10G012500/CmoCh14G008490/CmoCh20G001020	4	up&down
ko00230	Purine metabolism	12/405	169/5449	0.96	0.610027	0.857693	CmoCh02G005250/CmoCh06G003770/CmoCh07G007980/CmoCh07G008460/CmoCh07G009070/CmoCh09G012480/CmoCh13G008750/CmoCh15G004780/CmoCh15G012040/CmoCh16G000890/CmoCh16G003210/CmoCh18G012720	12	down
ko03420	Nucleotide excision repair	5/405	71/5449	0.95	0.616239	0.857693	CmoCh02G001380/CmoCh07G004790/CmoCh07G008460/CmoCh11G002120/CmoCh20G004050	5	up&down
ko04140	Regulation of autophagy	3/405	43/5449	0.94	0.629891	0.857693	CmoCh03G005610/CmoCh07G003010/CmoCh17G003890	3	up&down
ko00906	Carotenoid biosynthesis	3/405	44/5449	0.92	0.645576	0.857693	CmoCh02G018210/CmoCh05G014020/CmoCh07G009170	3	down
ko00261	Monobactam biosynthesis	1/405	14/5449	0.96	0.661287	0.857693	CmoCh04G000780	1	down
ko00300	Lysine biosynthesis	1/405	14/5449	0.96	0.661287	0.857693	CmoCh04G000780	1	down
ko00640	Propanoate metabolism	3/405	46/5449	0.88	0.675518	0.857693	CmoCh03G010860/CmoCh06G015100/CmoCh07G014140	3	up&down
ko00770	Pantothenate and CoA biosynthesis	2/405	31/5449	0.87	0.682472	0.857693	CmoCh05G001190/CmoCh17G012290	2	up&down
ko00430	Taurine and hypotaurine metabolism	1/405	15/5449	0.9	0.686526	0.857693	CmoCh04G022550	1	down
ko00750	Vitamin B6 metabolism	1/405	15/5449	0.9	0.686526	0.857693	CmoCh17G006810	1	down
ko03018	RNA degradation	7/405	109/5449	0.86	0.711052	0.857693	CmoCh08G000540/CmoCh08G010210/CmoCh10G008390/CmoCh11G002460/CmoCh17G001290/CmoCh17G009110/CmoCh18G006810	7	down
ko00310	Lysine degradation	2/405	33/5449	0.82	0.715558	0.857693	CmoCh02G012830/CmoCh16G007050	2	down
ko04070	Phosphatidylinositol signaling system	5/405	80/5449	0.84	0.719836	0.857693	CmoCh01G008600/CmoCh01G009830/CmoCh02G004610/CmoCh03G002080/CmoCh11G013840	5	up&down
ko00410	beta-Alanine metabolism	3/405	50/5449	0.81	0.729712	0.857693	CmoCh02G012830/CmoCh04G022550/CmoCh16G007050	3	down
ko01040	Biosynthesis of unsaturated fatty acids	2/405	34/5449	0.79	0.730989	0.857693	CmoCh02G017380/CmoCh12G000380	2	down
ko00240	Pyrimidine metabolism	8/405	128/5449	0.84	0.745857	0.857693	CmoCh01G010880/CmoCh02G005250/CmoCh07G007980/CmoCh07G008150/CmoCh07G008460/CmoCh09G012480/CmoCh17G012780/CmoCh18G012720	8	down
ko00590	Arachidonic acid metabolism	1/405	18/5449	0.75	0.751534	0.857693	CmoCh03G001730	1	up
ko00380	Tryptophan metabolism	3/405	52/5449	0.78	0.754023	0.857693	CmoCh02G012830/CmoCh16G007050/CmoCh18G001750	3	down
ko00760	Nicotinate and nicotinamide metabolism	1/405	21/5449	0.64	0.803086	0.857693	CmoCh14G001340	1	up
ko03410	Base excision repair	2/405	40/5449	0.67	0.809301	0.857693	CmoCh07G008460/CmoCh20G004050	2	down
ko00562	Inositol phosphate metabolism	5/405	91/5449	0.74	0.817293	0.857693	CmoCh01G009830/CmoCh02G004610/CmoCh10G007130/CmoCh11G013840/CmoCh12G013180	5	up&down
ko00531	Glycosaminoglycan degradation	1/405	22/5449	0.61	0.817779	0.857693	CmoCh05G007870	1	down
ko00904	Diterpenoid biosynthesis	2/405	41/5449	0.66	0.820183	0.857693	CmoCh02G016420/CmoCh13G005660	2	up&down
ko00290	Valine, leucine and isoleucine biosynthesis	1/405	24/5449	0.56	0.843963	0.857693	CmoCh05G001190	1	up
ko00920	Sulfur metabolism	2/405	44/5449	0.61	0.849563	0.857693	CmoCh05G012050/CmoCh14G004800	2	up&down
ko04130	SNARE interactions in vesicular transport	2/405	44/5449	0.61	0.849563	0.857693	CmoCh06G005300/CmoCh11G005190	2	up&down
ko00960	Tropane, piperidine and pyridine alkaloid biosynthesis	1/405	25/5449	0.54	0.855612	0.857693	CmoCh02G000900	1	up
ko00510	N-Glycan biosynthesis	2/405	46/5449	0.58	0.866654	0.857693	CmoCh03G013890/CmoCh18G007670	2	down
ko03008	Ribosome biogenesis in eukaryotes	4/405	82/5449	0.66	0.868981	0.857693	CmoCh06G007690/CmoCh11G009290/CmoCh11G012960/CmoCh16G001150	4	down
ko04146	Peroxisome	5/405	102/5449	0.66	0.885566	0.857693	CmoCh01G002830/CmoCh02G013720/CmoCh02G017380/CmoCh14G012300/CmoCh16G005980	5	up&down
ko00650	Butanoate metabolism	1/405	28/5449	0.48	0.885606	0.857693	CmoCh04G022550	1	down
ko03440	Homologous recombination	2/405	49/5449	0.55	0.888973	0.857693	CmoCh07G008460/CmoCh11G002120	2	down
ko04120	Ubiquitin mediated proteolysis	6/405	123/5449	0.66	0.904162	0.857693	CmoCh01G015870/CmoCh02G010180/CmoCh02G016700/CmoCh04G027800/CmoCh09G004920/CmoCh20G001030	6	up&down
ko00908	Zeatin biosynthesis	1/405	31/5449	0.43	0.909381	0.857693	CmoCh12G003920	1	up
ko00565	Ether lipid metabolism	1/405	33/5449	0.41	0.922424	0.857693	CmoCh03G001730	1	up
ko04141	Protein processing in endoplasmic reticulum	11/405	220/5449	0.67	0.944527	0.857693	CmoCh01G017990/CmoCh03G013890/CmoCh04G005650/CmoCh04G024830/CmoCh04G027600/CmoCh05G003160/CmoCh05G010910/CmoCh07G010280/CmoCh11G017250/CmoCh12G003530/CmoCh12G010450	11	up&down
ko04144	Endocytosis	10/405	218/5449	0.62	0.968583	0.857693	CmoCh04G027600/CmoCh07G000370/CmoCh07G010280/CmoCh11G019850/CmoCh14G001510/CmoCh14G008230/CmoCh15G000210/CmoCh18G005630/CmoCh19G008360/CmoCh20G004620	10	up&down
ko01210	2-Oxocarboxylic acid metabolism	2/405	69/5449	0.39	0.969021	0.857693	CmoCh04G000780/CmoCh05G001190	2	up&down
ko03060	Protein export	1/405	48/5449	0.28	0.97586	0.857693	CmoCh15G006660	1	down
ko03020	RNA polymerase	1/405	50/5449	0.27	0.979345	0.857693	CmoCh18G012720	1	down
ko03050	Proteasome	2/405	77/5449	0.35	0.981789	0.857693	CmoCh03G010560/CmoCh07G004140	2	down
ko00190	Oxidative phosphorylation	7/405	179/5449	0.53	0.98313	0.857693	CmoCh03G005600/CmoCh11G003690/CmoCh12G010430/CmoCh12G013390/CmoCh13G009520/CmoCh14G003020/CmoCh17G005340	7	up&down
ko03013	RNA transport	8/405	198/5449	0.54	0.983685	0.857693	CmoCh01G016050/CmoCh04G022310/CmoCh11G018680/CmoCh12G012390/CmoCh14G017340/CmoCh15G010820/CmoCh15G012570/CmoCh17G009110	8	up&down
ko03015	mRNA surveillance pathway	2/405	137/5449	0.2	0.999728	0.857693	CmoCh05G013350/CmoCh17G009110	2	down
ko03010	Ribosome	11/405	350/5449	0.42	0.999857	0.857693	CmoCh01G019480/CmoCh04G002670/CmoCh04G019620/CmoCh04G028310/CmoCh07G001880/CmoCh07G006580/CmoCh08G009610/CmoCh11G016860/CmoCh15G003540/CmoCh17G000470/CmoCh20G001970	11	down
ko03040	Spliceosome	3/405	215/5449	0.19	0.999992	0.857693	CmoCh04G022310/CmoCh04G027600/CmoCh07G010280	3	down
