# Supplementary material for: Transcriptomic analysis and physiological characteristics of exogenous naphthylacetic acid application to regulate the healing process of oriental melon grafted onto squash
Source: PeerJ. 2022 Sep 15;10:e13980. doi: 10.7717/peerj.13980 (PMC9482769; doi:10.7717/peerj.13980)
Supplement: Supplemental Information 13 [file peerj-10-13980-s013.xls]

## Sheet: KEGG_pathway_enrich_dotplot
ID	Description	GeneRatio	BgRatio	enrich_factor	pvalue	qvalue	geneID	Count	regulated
ko00591	Linoleic acid metabolism	16/405	35/4875	5.5	3.58732e-09	3.43627e-07	MELO3C000268.2/MELO3C004245.2/MELO3C004246.2/MELO3C004247.2/MELO3C004250.2/MELO3C004252.2/MELO3C014629.2/MELO3C014630.2/MELO3C014635.2/MELO3C014638.2/MELO3C015715.2/MELO3C027169.2/MELO3C027325.2/MELO3C031048.2/MELO3C031317.2/MELO3C031318.2	16	down
ko00940	Phenylpropanoid biosynthesis	31/405	169/4875	2.21	1.65082e-05	0.000790658	MELO3C003932.2/MELO3C004092.2/MELO3C006862.2/MELO3C007868.2/MELO3C009674.2/MELO3C010344.2/MELO3C010348.2/MELO3C010719.2/MELO3C011899.2/MELO3C011900.2/MELO3C014222.2/MELO3C014224.2/MELO3C014227.2/MELO3C014228.2/MELO3C014229.2/MELO3C014658.2/MELO3C015221.2/MELO3C015222.2/MELO3C017566.2/MELO3C017811.2/MELO3C019994.2/MELO3C021259.2/MELO3C021373.2/MELO3C022435.2/MELO3C023474.2/MELO3C023519.2/MELO3C025…	31	up&down
ko04141	Protein processing in endoplasmic reticulum	34/405	201/4875	2.04	3.81059e-05	0.00121672	MELO3C001614.2/MELO3C002786.2/MELO3C003143.2/MELO3C003195.2/MELO3C003917.2/MELO3C005733.2/MELO3C005923.2/MELO3C009996.2/MELO3C011345.2/MELO3C011908.2/MELO3C013945.2/MELO3C013946.2/MELO3C014827.2/MELO3C015294.2/MELO3C015295.2/MELO3C015425.2/MELO3C016112.2/MELO3C016449.2/MELO3C016897.2/MELO3C017801.2/MELO3C017883.2/MELO3C018485.2/MELO3C020588.2/MELO3C021648.2/MELO3C021658.2/MELO3C022116.2/MELO3C025…	34	up&down
ko00906	Carotenoid biosynthesis	9/405	34/4875	3.19	0.00138269	0.0331119	MELO3C006938.2/MELO3C008677.2/MELO3C010858.2/MELO3C014719.2/MELO3C014945.2/MELO3C016224.2/MELO3C022291.2/MELO3C027057.2/MELO3C035278.2	9	up&down
ko00592	alpha-Linolenic acid metabolism	11/405	57/4875	2.32	0.0063339	0.121344	MELO3C006334.2/MELO3C007845.2/MELO3C009932.2/MELO3C009933.2/MELO3C014629.2/MELO3C014630.2/MELO3C014635.2/MELO3C014638.2/MELO3C015715.2/MELO3C017009.2/MELO3C031048.2	11	up&down
ko00945	Stilbenoid, diarylheptanoid and gingerol biosynthesis	5/405	17/4875	3.54	0.0103243	0.140492	MELO3C003932.2/MELO3C010719.2/MELO3C011899.2/MELO3C011900.2/MELO3C023474.2	5	down
ko00360	Phenylalanine metabolism	11/405	61/4875	2.17	0.0106308	0.140492	MELO3C003932.2/MELO3C004092.2/MELO3C005578.2/MELO3C014222.2/MELO3C014224.2/MELO3C014227.2/MELO3C014228.2/MELO3C014229.2/MELO3C014480.2/MELO3C017811.2/MELO3C025613.2	11	up&down
ko00941	Flavonoid biosynthesis	6/405	24/4875	3.01	0.0117334	0.140492	MELO3C003932.2/MELO3C010719.2/MELO3C011899.2/MELO3C011900.2/MELO3C023474.2/MELO3C035229.2	6	up&down
ko04075	Plant hormone signal transduction	34/405	282/4875	1.45	0.015858	0.168781	MELO3C003299.2/MELO3C003412.2/MELO3C003696.2/MELO3C004498.2/MELO3C005991.2/MELO3C006852.2/MELO3C007597.2/MELO3C008287.2/MELO3C008478.2/MELO3C009181.2/MELO3C010925.2/MELO3C011260.2/MELO3C013003.2/MELO3C013558.2/MELO3C013854.2/MELO3C015359.2/MELO3C015408.2/MELO3C015633.2/MELO3C016272.2/MELO3C016616.2/MELO3C016786.2/MELO3C017825.2/MELO3C018394.2/MELO3C018458.2/MELO3C018539.2/MELO3C019931.2/MELO3C020…	34	up&down
ko00410	beta-Alanine metabolism	8/405	42/4875	2.29	0.0202648	0.185491	MELO3C001938.2/MELO3C004624.2/MELO3C005578.2/MELO3C008477.2/MELO3C014480.2/MELO3C017100.2/MELO3C017103.2/MELO3C023571.2	8	up&down
ko00910	Nitrogen metabolism	7/405	35/4875	2.41	0.0226916	0.185491	MELO3C000140.2/MELO3C009476.2/MELO3C010444.2/MELO3C011095.2/MELO3C019505.2/MELO3C022772.2/MELO3C022828.2	7	up&down
ko00261	Monobactam biosynthesis	3/405	8/4875	4.51	0.0232374	0.185491	MELO3C003762.2/MELO3C013171.2/MELO3C014280.2	3	up&down
ko00710	Carbon fixation in photosynthetic organisms	12/405	79/4875	1.83	0.028504	0.21003	MELO3C000130.2/MELO3C003214.2/MELO3C003491.2/MELO3C006585.2/MELO3C011959.2/MELO3C012252.2/MELO3C014752.2/MELO3C015407.2/MELO3C023354.2/MELO3C024441.2/MELO3C025149.2/MELO3C026722.2	12	up&down
ko00909	Sesquiterpenoid and triterpenoid biosynthesis	4/405	16/4875	3.01	0.0382762	0.26189	MELO3C001812.2/MELO3C002941.2/MELO3C016845.2/MELO3C022374.2	4	down
ko00062	Fatty acid elongation	5/405	25/4875	2.41	0.0512766	0.327451	MELO3C011901.2/MELO3C012246.2/MELO3C013669.2/MELO3C016930.2/MELO3C023819.2	5	up&down
ko00460	Cyanoamino acid metabolism	9/405	60/4875	1.81	0.0575435	0.344504	MELO3C004061.2/MELO3C009674.2/MELO3C015221.2/MELO3C015222.2/MELO3C019450.2/MELO3C023519.2/MELO3C026609.2/MELO3C028503.2/MELO3C030711.2	9	up&down
ko00630	Glyoxylate and dicarboxylate metabolism	11/405	82/4875	1.61	0.075006	0.422634	MELO3C000130.2/MELO3C006734.2/MELO3C007124.2/MELO3C010045.2/MELO3C011959.2/MELO3C012252.2/MELO3C013350.2/MELO3C014568.2/MELO3C019450.2/MELO3C022828.2/MELO3C026532.2	11	up&down
ko00195	Photosynthesis	15/405	127/4875	1.42	0.102865	0.525215	MELO3C000173.2/MELO3C000428.2/MELO3C006032.2/MELO3C008060.2/MELO3C008663.2/MELO3C008731.2/MELO3C010608.2/MELO3C010708.2/MELO3C012971.2/MELO3C016181.2/MELO3C016190.2/MELO3C019441.2/MELO3C019895.2/MELO3C027714.2/MELO3C032367.2	15	up
ko02010	ABC transporters	4/405	22/4875	2.19	0.104177	0.525215	MELO3C003428.2/MELO3C008741.2/MELO3C011815.2/MELO3C021491.2	4	down
ko03010	Ribosome	37/405	371/4875	1.2	0.134119	0.642361	Cucumis_melo_newGene_713/MELO3C001415.2/MELO3C002294.2/MELO3C003061.2/MELO3C003811.2/MELO3C003890.2/MELO3C004612.2/MELO3C005089.2/MELO3C005401.2/MELO3C005952.2/MELO3C005983.2/MELO3C006280.2/MELO3C006922.2/MELO3C007167.2/MELO3C009036.2/MELO3C009489.2/MELO3C009965.2/MELO3C010337.2/MELO3C010618.2/MELO3C011285.2/MELO3C015373.2/MELO3C015438.2/MELO3C016082.2/MELO3C018954.2/MELO3C019524.2/MELO3C019631.2…	37	up
ko00562	Inositol phosphate metabolism	8/405	63/4875	1.53	0.148627	0.677949	MELO3C000333.2/MELO3C004609.2/MELO3C013014.2/MELO3C017581.2/MELO3C017795.2/MELO3C018331.2/MELO3C020821.2/MELO3C029352.2	8	up&down
ko00260	Glycine, serine and threonine metabolism	10/405	90/4875	1.34	0.211477	0.90886	MELO3C005578.2/MELO3C006734.2/MELO3C011367.2/MELO3C011959.2/MELO3C013350.2/MELO3C014480.2/MELO3C014568.2/MELO3C019450.2/MELO3C021447.2/MELO3C027288.2	10	up&down
ko00740	Riboflavin metabolism	2/405	11/4875	2.19	0.230863	0.90886	MELO3C000760.2/MELO3C024827.2	2	down
ko00196	Photosynthesis - antenna proteins	3/405	21/4875	1.72	0.251194	0.90886	MELO3C002727.2/MELO3C004214.2/MELO3C012912.2	3	up
ko00905	Brassinosteroid biosynthesis	2/405	12/4875	2.01	0.262787	0.90886	MELO3C021600.2/MELO3C026634.2	2	down
ko00902	Monoterpenoid biosynthesis	1/405	4/4875	3.01	0.293222	0.90886	MELO3C002516.2	1	down
ko00330	Arginine and proline metabolism	6/405	57/4875	1.27	0.335187	0.90886	MELO3C004624.2/MELO3C008477.2/MELO3C017100.2/MELO3C017103.2/MELO3C023571.2/MELO3C027387.2	6	up&down
ko04070	Phosphatidylinositol signaling system	6/405	57/4875	1.27	0.335187	0.90886	MELO3C000333.2/MELO3C006721.2/MELO3C017511.2/MELO3C017795.2/MELO3C018331.2/MELO3C020821.2	6	up&down
ko00950	Isoquinoline alkaloid biosynthesis	3/405	25/4875	1.44	0.344888	0.90886	MELO3C005578.2/MELO3C014480.2/MELO3C025613.2	3	up&down
ko00960	Tropane, piperidine and pyridine alkaloid biosynthesis	3/405	25/4875	1.44	0.344888	0.90886	MELO3C005578.2/MELO3C014480.2/MELO3C025613.2	3	up&down
ko00071	Fatty acid degradation	4/405	37/4875	1.3	0.369894	0.90886	MELO3C005792.2/MELO3C006334.2/MELO3C012928.2/MELO3C017100.2	4	up&down
ko04146	Peroxisome	8/405	85/4875	1.13	0.410736	0.90886	MELO3C006334.2/MELO3C007124.2/MELO3C012928.2/MELO3C014568.2/MELO3C020487.2/MELO3C021431.2/MELO3C026532.2/MELO3C028797.2	8	up&down
ko04712	Circadian rhythm - plant	4/405	41/4875	1.17	0.447104	0.90886	MELO3C005738.2/MELO3C005921.2/MELO3C019731.2/MELO3C035120.2	4	up&down
ko00514	Other types of O-glycan biosynthesis	1/405	7/4875	1.72	0.455296	0.90886	MELO3C003961.2	1	down
ko00130	Ubiquinone and other terpenoid-quinone biosynthesis	4/405	42/4875	1.15	0.465998	0.90886	MELO3C003932.2/MELO3C004092.2/MELO3C025613.2/MELO3C025861.2	4	up&down
ko03020	RNA polymerase	6/405	66/4875	1.09	0.472239	0.90886	MELO3C002173.2/MELO3C003707.2/MELO3C006706.2/MELO3C006881.2/MELO3C008157.2/MELO3C020585.2	6	up
ko00511	Other glycan degradation	2/405	19/4875	1.27	0.476574	0.90886	MELO3C018385.2/MELO3C019553.2	2	down
ko00053	Ascorbate and aldarate metabolism	4/405	45/4875	1.07	0.52115	0.90886	MELO3C004609.2/MELO3C013014.2/MELO3C015643.2/MELO3C017100.2	4	down
ko00350	Tyrosine metabolism	4/405	45/4875	1.07	0.52115	0.90886	MELO3C005578.2/MELO3C005792.2/MELO3C014480.2/MELO3C025613.2	4	up&down
ko00480	Glutathione metabolism	8/405	94/4875	1.02	0.526187	0.90886	MELO3C003188.2/MELO3C003201.2/MELO3C008477.2/MELO3C016167.2/MELO3C016951.2/MELO3C017103.2/MELO3C030300.2/MELO3C032563.2	8	up&down
ko01040	Biosynthesis of unsaturated fatty acids	2/405	21/4875	1.15	0.530789	0.90886	MELO3C006334.2/MELO3C011901.2	2	up
ko00561	Glycerolipid metabolism	5/405	58/4875	1.04	0.534392	0.90886	MELO3C002154.2/MELO3C009182.2/MELO3C015908.2/MELO3C017100.2/MELO3C017511.2	5	up&down
ko00300	Lysine biosynthesis	1/405	10/4875	1.2	0.580275	0.90886	MELO3C013171.2	1	up
ko00450	Selenocompound metabolism	2/405	23/4875	1.05	0.581056	0.90886	MELO3C003762.2/MELO3C014280.2	2	up&down
ko00565	Ether lipid metabolism	2/405	24/4875	1	0.604665	0.90886	MELO3C005163.2/MELO3C029352.2	2	up
ko00564	Glycerophospholipid metabolism	7/405	88/4875	0.96	0.605255	0.90886	MELO3C005163.2/MELO3C009182.2/MELO3C015908.2/MELO3C017356.2/MELO3C017511.2/MELO3C020821.2/MELO3C029352.2	7	up&down
ko00430	Taurine and hypotaurine metabolism	1/405	11/4875	1.09	0.615216	0.90886	MELO3C001938.2	1	up
ko03008	Ribosome biogenesis in eukaryotes	7/405	89/4875	0.95	0.617426	0.90886	MELO3C000036.2/MELO3C004514.2/MELO3C005127.2/MELO3C010355.2/MELO3C016319.2/MELO3C023673.2/MELO3C029467.2	7	up&down
ko00908	Zeatin biosynthesis	2/405	25/4875	0.96	0.627254	0.90886	MELO3C021401.2/MELO3C022098.2	2	down
ko03040	Spliceosome	15/405	194/4875	0.93	0.655697	0.90886	MELO3C003917.2/MELO3C004514.2/MELO3C006732.2/MELO3C009595.2/MELO3C010355.2/MELO3C015160.2/MELO3C015891.2/MELO3C017020.2/MELO3C018220.2/MELO3C020538.2/MELO3C021648.2/MELO3C021658.2/MELO3C023964.2/MELO3C024552.2/MELO3C032507.2	15	up&down
ko01200	Carbon metabolism	23/405	296/4875	0.94	0.667415	0.90886	MELO3C000130.2/MELO3C003214.2/MELO3C003491.2/MELO3C006585.2/MELO3C006734.2/MELO3C007124.2/MELO3C010045.2/MELO3C011367.2/MELO3C011959.2/MELO3C012252.2/MELO3C013009.2/MELO3C013350.2/MELO3C014568.2/MELO3C014752.2/MELO3C015407.2/MELO3C019450.2/MELO3C021447.2/MELO3C023354.2/MELO3C024441.2/MELO3C025149.2/MELO3C026532.2/MELO3C026722.2/MELO3C027288.2	23	up&down
ko00073	Cutin, suberine and wax biosynthesis	2/405	27/4875	0.89	0.669403	0.90886	MELO3C005686.2/MELO3C021431.2	2	down
ko00061	Fatty acid biosynthesis	3/405	41/4875	0.88	0.674292	0.90886	MELO3C012928.2/MELO3C021059.2/MELO3C025309.2	3	up&down
ko00900	Terpenoid backbone biosynthesis	4/405	55/4875	0.88	0.681919	0.90886	MELO3C015691.2/MELO3C017499.2/MELO3C025855.2/MELO3C026512.2	4	up&down
ko03013	RNA transport	11/405	147/4875	0.9	0.687795	0.90886	MELO3C000249.2/MELO3C000453.2/MELO3C004807.2/MELO3C013163.2/MELO3C015160.2/MELO3C016319.2/MELO3C018807.2/MELO3C019737.2/MELO3C023673.2/MELO3C025375.2/MELO3C029467.2	11	up&down
ko04144	Endocytosis	13/405	173/4875	0.9	0.690788	0.90886	MELO3C000333.2/MELO3C003917.2/MELO3C004551.2/MELO3C009966.2/MELO3C011512.2/MELO3C012232.2/MELO3C012432.2/MELO3C015692.2/MELO3C019823.2/MELO3C021556.2/MELO3C021648.2/MELO3C021658.2/MELO3C023630.2	13	up&down
ko00040	Pentose and glucuronate interconversions	10/405	135/4875	0.89	0.695691	0.90886	MELO3C010706.2/MELO3C012394.2/MELO3C012791.2/MELO3C013699.2/MELO3C015419.2/MELO3C015963.2/MELO3C017100.2/MELO3C019840.2/MELO3C021607.2/MELO3C024306.2	10	up&down
ko00590	Arachidonic acid metabolism	1/405	14/4875	0.86	0.703568	0.90886	MELO3C016951.2	1	up
ko00620	Pyruvate metabolism	8/405	110/4875	0.88	0.705381	0.90886	MELO3C002451.2/MELO3C003491.2/MELO3C006585.2/MELO3C006734.2/MELO3C015407.2/MELO3C017100.2/MELO3C024441.2/MELO3C024465.2	8	up&down
ko04145	Phagosome	5/405	71/4875	0.85	0.714424	0.90886	MELO3C011016.2/MELO3C016112.2/MELO3C017801.2/MELO3C018025.2/MELO3C018331.2	5	up&down
ko00280	Valine, leucine and isoleucine degradation	3/405	44/4875	0.82	0.72057	0.90886	MELO3C006334.2/MELO3C006734.2/MELO3C017100.2	3	up&down
ko00051	Fructose and mannose metabolism	4/405	58/4875	0.83	0.722038	0.90886	MELO3C003214.2/MELO3C013009.2/MELO3C019796.2/MELO3C023354.2	4	up&down
ko00100	Steroid biosynthesis	2/405	30/4875	0.8	0.725304	0.90886	MELO3C016845.2/MELO3C022613.2	2	down
ko00052	Galactose metabolism	4/405	59/4875	0.82	0.734549	0.90886	MELO3C002287.2/MELO3C009979.2/MELO3C013009.2/MELO3C025521.2	4	up
ko00920	Sulfur metabolism	3/405	45/4875	0.8	0.734815	0.90886	MELO3C002563.2/MELO3C003762.2/MELO3C014280.2	3	up&down
ko00860	Porphyrin and chlorophyll metabolism	3/405	46/4875	0.79	0.748481	0.90886	MELO3C007233.2/MELO3C013592.2/MELO3C035546.2	3	up
ko00290	Valine, leucine and isoleucine biosynthesis	1/405	16/4875	0.75	0.75091	0.90886	MELO3C027288.2	1	down
ko00400	Phenylalanine, tyrosine and tryptophan biosynthesis	3/405	49/4875	0.74	0.786116	0.90886	MELO3C011037.2/MELO3C025613.2/MELO3C033348.2	3	up&down
ko00270	Cysteine and methionine metabolism	6/405	92/4875	0.79	0.788312	0.90886	MELO3C006291.2/MELO3C008477.2/MELO3C013806.2/MELO3C016340.2/MELO3C017103.2/MELO3C025613.2	6	up&down
ko00340	Histidine metabolism	1/405	18/4875	0.67	0.790707	0.90886	MELO3C017100.2	1	down
ko00730	Thiamine metabolism	1/405	18/4875	0.67	0.790707	0.90886	MELO3C017499.2	1	down
ko00790	Folate biosynthesis	1/405	18/4875	0.67	0.790707	0.90886	MELO3C014535.2	1	down
ko04122	Sulfur relay system	1/405	18/4875	0.67	0.790707	0.90886	MELO3C014535.2	1	down
ko01212	Fatty acid metabolism	4/405	64/4875	0.75	0.790787	0.90886	MELO3C006334.2/MELO3C011901.2/MELO3C012928.2/MELO3C025309.2	4	up&down
ko04626	Plant-pathogen interaction	9/405	134/4875	0.81	0.794835	0.90886	MELO3C006721.2/MELO3C010057.2/MELO3C014066.2/MELO3C015294.2/MELO3C015295.2/MELO3C015312.2/MELO3C018445.2/MELO3C018539.2/MELO3C020899.2	9	up&down
ko00500	Starch and sucrose metabolism	19/405	268/4875	0.85	0.802323	0.90886	MELO3C006362.2/MELO3C009674.2/MELO3C012010.2/MELO3C013699.2/MELO3C013887.2/MELO3C015221.2/MELO3C015222.2/MELO3C015419.2/MELO3C015963.2/MELO3C017588.2/MELO3C018667.2/MELO3C019691.2/MELO3C020428.2/MELO3C023067.2/MELO3C023519.2/MELO3C024306.2/MELO3C026609.2/MELO3C028503.2/MELO3C030711.2	19	up&down
ko04120	Ubiquitin mediated proteolysis	7/405	108/4875	0.78	0.80548	0.90886	Cucumis_melo_newGene_571/MELO3C005733.2/MELO3C008080.2/MELO3C009417.2/MELO3C011345.2/MELO3C019731.2/MELO3C035120.2	7	up&down
ko00670	One carbon pool by folate	1/405	19/4875	0.63	0.808159	0.90886	MELO3C019450.2	1	down
ko03060	Protein export	3/405	51/4875	0.71	0.808529	0.90886	MELO3C014306.2/MELO3C016112.2/MELO3C023413.2	3	up&down
ko00780	Biotin metabolism	1/405	20/4875	0.6	0.824159	0.90886	MELO3C012993.2	1	up
ko00310	Lysine degradation	1/405	21/4875	0.57	0.838827	0.90886	MELO3C017100.2	1	down
ko00010	Glycolysis / Gluconeogenesis	9/405	142/4875	0.76	0.846465	0.90886	MELO3C003214.2/MELO3C003491.2/MELO3C005792.2/MELO3C006734.2/MELO3C011367.2/MELO3C013009.2/MELO3C017100.2/MELO3C021447.2/MELO3C023354.2	9	up&down
ko00250	Alanine, aspartate and glutamate metabolism	5/405	85/4875	0.71	0.846514	0.90886	MELO3C001938.2/MELO3C011959.2/MELO3C014568.2/MELO3C022828.2/MELO3C026404.2	5	up&down
ko00380	Tryptophan metabolism	2/405	39/4875	0.62	0.847138	0.90886	MELO3C017100.2/MELO3C026532.2	2	down
ko00030	Pentose phosphate pathway	3/405	59/4875	0.61	0.879312	0.90886	MELO3C003214.2/MELO3C013009.2/MELO3C023354.2	3	up
ko00220	Arginine biosynthesis	2/405	46/4875	0.52	0.905429	0.90886	MELO3C011959.2/MELO3C022828.2	2	up
ko00520	Amino sugar and nucleotide sugar metabolism	7/405	127/4875	0.66	0.913437	0.90886	MELO3C005858.2/MELO3C005859.2/MELO3C007961.2/MELO3C007965.2/MELO3C018667.2/MELO3C019691.2/MELO3C020428.2	7	up&down
ko00020	Citrate cycle (TCA cycle)	2/405	50/4875	0.48	0.928657	0.90886	MELO3C003491.2/MELO3C006734.2	2	down
ko00650	Butanoate metabolism	2/405	50/4875	0.48	0.928657	0.90886	MELO3C001938.2/MELO3C026404.2	2	up&down
ko00904	Diterpenoid biosynthesis	1/405	34/4875	0.35	0.948148	0.90886	MELO3C005397.2	1	down
ko03050	Proteasome	2/405	55/4875	0.44	0.950161	0.90886	MELO3C025735.2/MELO3C026538.2	2	up
ko00970	Aminoacyl-tRNA biosynthesis	2/405	58/4875	0.42	0.959934	0.90886	MELO3C000039.2/MELO3C024031.2	2	up&down
ko00510	N-Glycan biosynthesis	1/405	38/4875	0.32	0.963445	0.90886	MELO3C021632.2	1	down
ko03430	Mismatch repair	1/405	38/4875	0.32	0.963445	0.90886	MELO3C015928.2	1	down
ko00640	Propanoate metabolism	1/405	39/4875	0.31	0.966506	0.90886	MELO3C006734.2	1	down
ko03410	Base excision repair	1/405	40/4875	0.3	0.969311	0.90886	MELO3C012172.2	1	down
ko03022	Basal transcription factors	1/405	41/4875	0.29	0.971882	0.90886	MELO3C022035.2	1	down
ko00230	Purine metabolism	10/405	201/4875	0.6	0.976587	0.90886	MELO3C002173.2/MELO3C003707.2/MELO3C003762.2/MELO3C005556.2/MELO3C006706.2/MELO3C006881.2/MELO3C008157.2/MELO3C013768.2/MELO3C014280.2/MELO3C020585.2	10	up&down
ko00190	Oxidative phosphorylation	9/405	189/4875	0.57	0.98033	0.90886	Cucumis_melo_newGene_625/MELO3C003107.2/MELO3C004004.2/MELO3C004105.2/MELO3C017960.2/MELO3C019495.2/MELO3C024729.2/MELO3C030665.2/MELO3C035505.2	9	up&down
ko03440	Homologous recombination	1/405	47/4875	0.26	0.983371	0.90886	MELO3C026538.2	1	up
ko00240	Pyrimidine metabolism	6/405	146/4875	0.49	0.985727	0.90886	MELO3C002173.2/MELO3C003707.2/MELO3C006706.2/MELO3C006881.2/MELO3C008157.2/MELO3C020585.2	6	up
ko01210	2-Oxocarboxylic acid metabolism	1/405	58/4875	0.21	0.993663	0.90886	MELO3C011959.2	1	up
ko01230	Biosynthesis of amino acids	12/405	260/4875	0.56	0.993779	0.90886	MELO3C011037.2/MELO3C011367.2/MELO3C011959.2/MELO3C013009.2/MELO3C013171.2/MELO3C019450.2/MELO3C021447.2/MELO3C022828.2/MELO3C023354.2/MELO3C025613.2/MELO3C027288.2/MELO3C033348.2	12	up&down
ko03015	mRNA surveillance pathway	3/405	109/4875	0.33	0.99567	0.90886	MELO3C001923.2/MELO3C011126.2/MELO3C015160.2	3	up&down
ko03018	RNA degradation	3/405	111/4875	0.33	0.99625	0.90886	MELO3C013009.2/MELO3C023964.2/MELO3C025580.2	3	up
