# Supplementary material for: Transcriptomic analysis and physiological characteristics of exogenous naphthylacetic acid application to regulate the healing process of oriental melon grafted onto squash
Source: PeerJ. 2022 Sep 15;10:e13980. doi: 10.7717/peerj.13980 (PMC9482769; doi:10.7717/peerj.13980)
Supplement: Supplemental Information 14 [file peerj-10-13980-s014.xls]

## Sheet: KEGG_pathway_enrich_dotplot
ID	Description	GeneRatio	BgRatio	enrich_factor	pvalue	qvalue	geneID	Count	regulated
ko03010	Ribosome	123/612	350/5449	3.13	4.61581e-35	4.90734e-33	CmoCh00G000300/CmoCh01G000160/CmoCh01G000520/CmoCh01G000750/CmoCh01G002230/CmoCh01G005930/CmoCh01G013880/CmoCh01G015360/CmoCh02G003520/CmoCh02G004420/CmoCh02G010040/CmoCh02G010290/CmoCh02G010340/CmoCh02G011030/CmoCh02G013750/CmoCh02G017660/CmoCh02G018360/CmoCh03G006500/CmoCh03G011790/CmoCh03G013620/CmoCh04G001620/CmoCh04G002490/CmoCh04G003690/CmoCh04G003980/CmoCh04G006630/CmoCh04G007000/CmoCh04G0…	123	up
ko03030	DNA replication	21/612	55/5449	3.4	1.70841e-07	9.08156e-06	CmoCh01G014210/CmoCh02G005250/CmoCh03G013810/CmoCh04G001740/CmoCh05G014080/CmoCh07G001170/CmoCh08G001720/CmoCh08G004610/CmoCh09G005110/CmoCh09G012480/CmoCh11G002120/CmoCh11G003860/CmoCh13G004630/CmoCh13G010850/CmoCh14G003110/CmoCh14G004220/CmoCh14G010780/CmoCh14G020000/CmoCh17G010080/CmoCh18G000230/CmoCh20G004050	21	up&down
ko00360	Phenylalanine metabolism	20/612	65/5449	2.74	1.59862e-05	0.000566527	CmoCh01G013720/CmoCh03G012270/CmoCh03G012280/CmoCh03G012290/CmoCh05G007700/CmoCh07G009470/CmoCh07G009480/CmoCh07G009490/CmoCh07G009500/CmoCh07G009510/CmoCh07G009520/CmoCh07G009530/CmoCh07G009550/CmoCh07G009560/CmoCh08G005650/CmoCh08G011220/CmoCh11G003950/CmoCh11G013620/CmoCh17G008870/CmoCh19G002210	20	up&down
ko00940	Phenylpropanoid biosynthesis	38/612	211/5449	1.6	0.00191413	0.0508756	CmoCh00G001520/CmoCh01G007480/CmoCh02G003680/CmoCh02G012490/CmoCh02G012500/CmoCh03G012270/CmoCh03G012280/CmoCh03G012290/CmoCh04G005010/CmoCh04G019070/CmoCh04G030950/CmoCh05G007700/CmoCh07G009470/CmoCh07G009480/CmoCh07G009490/CmoCh07G009500/CmoCh07G009510/CmoCh07G009520/CmoCh07G009530/CmoCh07G009550/CmoCh07G009560/CmoCh07G012020/CmoCh08G005650/CmoCh08G005780/CmoCh08G011700/CmoCh10G003670/CmoCh10G0…	38	up&down
ko03430	Mismatch repair	12/612	46/5449	2.32	0.00384006	0.0816517	CmoCh01G014210/CmoCh04G001740/CmoCh05G014080/CmoCh09G005110/CmoCh11G002120/CmoCh11G003860/CmoCh13G010360/CmoCh13G010850/CmoCh14G003110/CmoCh14G004220/CmoCh18G000230/CmoCh20G004050	12	up&down
ko03440	Homologous recombination	12/612	49/5449	2.18	0.00665274	0.117882	CmoCh05G010980/CmoCh05G014080/CmoCh09G005110/CmoCh10G007550/CmoCh11G002120/CmoCh11G003860/CmoCh13G010850/CmoCh14G000380/CmoCh14G003110/CmoCh14G004220/CmoCh18G000230/CmoCh18G001230	12	up&down
ko00591	Linoleic acid metabolism	7/612	24/5449	2.6	0.0136258	0.206948	CmoCh02G012600/CmoCh05G011230/CmoCh05G011240/CmoCh05G011410/CmoCh08G007730/CmoCh13G001100/CmoCh20G000640	7	up&down
ko00941	Flavonoid biosynthesis	7/612	26/5449	2.4	0.0212508	0.282412	CmoCh04G019070/CmoCh04G024560/CmoCh05G007700/CmoCh07G012020/CmoCh08G005780/CmoCh11G013620/CmoCh15G004320	7	up&down
ko00592	alpha-Linolenic acid metabolism	10/612	49/5449	1.82	0.0426449	0.503759	CmoCh01G010340/CmoCh01G019880/CmoCh02G012600/CmoCh08G007730/CmoCh08G012070/CmoCh09G010960/CmoCh10G007910/CmoCh11G013280/CmoCh14G006450/CmoCh20G000640	10	up&down
ko00945	Stilbenoid, diarylheptanoid and gingerol biosynthesis	5/612	20/5449	2.23	0.0653474	0.694746	CmoCh04G019070/CmoCh05G007700/CmoCh07G012020/CmoCh08G005780/CmoCh11G013620	5	down
ko00500	Starch and sucrose metabolism	44/612	330/5449	1.19	0.124671	0.966489	CmoCh01G019840/CmoCh02G003680/CmoCh02G009180/CmoCh02G009980/CmoCh02G012340/CmoCh03G013370/CmoCh04G000840/CmoCh04G002980/CmoCh04G008650/CmoCh04G010920/CmoCh04G011120/CmoCh04G018000/CmoCh04G023950/CmoCh06G006860/CmoCh06G008520/CmoCh06G011760/CmoCh07G001660/CmoCh08G009750/CmoCh10G003670/CmoCh10G007030/CmoCh10G008210/CmoCh10G010000/CmoCh10G010020/CmoCh11G001070/CmoCh11G006650/CmoCh11G007680/CmoCh13G0…	44	up&down
ko00740	Riboflavin metabolism	3/612	12/5449	2.23	0.144004	0.966489	CmoCh04G004280/CmoCh10G008660/CmoCh15G009520	3	down
ko00630	Glyoxylate and dicarboxylate metabolism	14/612	92/5449	1.35	0.146136	0.966489	CmoCh01G003910/CmoCh03G008930/CmoCh03G009610/CmoCh08G006150/CmoCh11G018110/CmoCh13G004560/CmoCh14G006620/CmoCh14G006630/CmoCh14G012270/CmoCh14G016070/CmoCh14G017130/CmoCh18G007800/CmoCh18G010270/CmoCh20G001070	14	up&down
ko00280	Valine, leucine and isoleucine degradation	9/612	55/5449	1.46	0.158306	0.966489	CmoCh02G008790/CmoCh02G013280/CmoCh03G008880/CmoCh03G010860/CmoCh06G015100/CmoCh08G003230/CmoCh09G010800/CmoCh11G018110/CmoCh14G016070	9	up&down
ko03420	Nucleotide excision repair	11/612	71/5449	1.38	0.167929	0.966489	CmoCh01G014210/CmoCh03G010130/CmoCh04G001740/CmoCh05G014080/CmoCh09G005110/CmoCh11G002120/CmoCh11G003860/CmoCh14G003110/CmoCh14G004220/CmoCh20G003750/CmoCh20G004050	11	up&down
ko00240	Pyrimidine metabolism	18/612	128/5449	1.25	0.185805	0.966489	CmoCh02G005250/CmoCh03G003150/CmoCh05G002420/CmoCh06G009630/CmoCh07G007980/CmoCh07G008150/CmoCh08G001720/CmoCh09G012480/CmoCh14G004220/CmoCh14G005390/CmoCh14G007350/CmoCh14G015000/CmoCh15G008100/CmoCh18G002200/CmoCh18G005930/CmoCh18G012510/CmoCh19G011570/CmoCh20G006710	18	up&down
ko00650	Butanoate metabolism	5/612	28/5449	1.59	0.199736	0.966489	CmoCh02G013280/CmoCh04G006590/CmoCh10G008780/CmoCh11G018110/CmoCh16G005300	5	up&down
ko00261	Monobactam biosynthesis	3/612	14/5449	1.91	0.20223	0.966489	CmoCh14G017980/CmoCh14G020470/CmoCh17G001960	3	up&down
ko03008	Ribosome biogenesis in eukaryotes	12/612	82/5449	1.3	0.205119	0.966489	CmoCh02G017820/CmoCh06G003030/CmoCh07G012150/CmoCh10G005930/CmoCh11G005540/CmoCh11G005550/CmoCh11G012960/CmoCh12G012430/CmoCh14G005180/CmoCh16G001150/CmoCh18G000140/CmoCh19G001100	12	up
ko00072	Synthesis and degradation of ketone bodies	2/612	8/5449	2.23	0.224148	0.966489	CmoCh02G013280/CmoCh11G018110	2	up&down
ko00710	Carbon fixation in photosynthetic organisms	14/612	105/5449	1.19	0.287626	0.966489	CmoCh01G015120/CmoCh02G003650/CmoCh02G016900/CmoCh03G009020/CmoCh04G008890/CmoCh04G008900/CmoCh09G000370/CmoCh10G006950/CmoCh14G002730/CmoCh14G013270/CmoCh18G007800/CmoCh18G010270/CmoCh19G002230/CmoCh20G003060	14	up&down
ko00232	Caffeine metabolism	1/612	3/5449	2.97	0.300565	0.966489	CmoCh10G009790	1	down
ko00062	Fatty acid elongation	6/612	41/5449	1.3	0.310326	0.966489	CmoCh00G001680/CmoCh02G008410/CmoCh04G002500/CmoCh10G006270/CmoCh11G005490/CmoCh20G004730	6	up&down
ko00904	Diterpenoid biosynthesis	6/612	41/5449	1.3	0.310326	0.966489	CmoCh04G006990/CmoCh13G005660/CmoCh13G007420/CmoCh14G020100/CmoCh19G000340/CmoCh19G004710	6	up&down
ko04075	Plant hormone signal transduction	46/612	382/5449	1.07	0.325916	0.966489	CmoCh03G003400/CmoCh03G009710/CmoCh03G013280/CmoCh04G010930/CmoCh04G011580/CmoCh04G016750/CmoCh04G026070/CmoCh05G013100/CmoCh06G000040/CmoCh07G006010/CmoCh07G006870/CmoCh08G001220/CmoCh08G001830/CmoCh08G007820/CmoCh09G006100/CmoCh09G009030/CmoCh10G004370/CmoCh11G004020/CmoCh11G005910/CmoCh11G008190/CmoCh11G011450/CmoCh11G019780/CmoCh12G004350/CmoCh12G005100/CmoCh12G012320/CmoCh13G002360/CmoCh14G0…	46	up&down
ko04145	Phagosome	12/612	92/5449	1.16	0.335894	0.966489	CmoCh04G000490/CmoCh05G010910/CmoCh07G006190/CmoCh07G010840/CmoCh08G008010/CmoCh11G011110/CmoCh13G008620/CmoCh14G000910/CmoCh14G014450/CmoCh16G003240/CmoCh17G006330/CmoCh18G002220	12	up&down
ko00330	Arginine and proline metabolism	9/612	70/5449	1.14	0.386606	0.966489	CmoCh01G013800/CmoCh02G003620/CmoCh03G001720/CmoCh04G029620/CmoCh05G010330/CmoCh08G005030/CmoCh08G009310/CmoCh10G001400/CmoCh11G010710	9	up&down
ko00260	Glycine, serine and threonine metabolism	11/612	88/5449	1.11	0.401114	0.966489	CmoCh01G000280/CmoCh02G013840/CmoCh03G008930/CmoCh03G011870/CmoCh08G006150/CmoCh08G011220/CmoCh11G009910/CmoCh13G004560/CmoCh14G016070/CmoCh18G007800/CmoCh20G001070	11	up&down
ko02010	ABC transporters	4/612	29/5449	1.23	0.413514	0.966489	CmoCh03G000570/CmoCh05G007960/CmoCh12G009560/CmoCh15G002920	4	up&down
ko00640	Propanoate metabolism	6/612	46/5449	1.16	0.414849	0.966489	CmoCh03G008880/CmoCh03G010860/CmoCh06G015100/CmoCh09G010800/CmoCh11G018110/CmoCh14G016070	6	up&down
ko00230	Purine metabolism	20/612	169/5449	1.05	0.437249	0.966489	CmoCh02G005250/CmoCh02G016370/CmoCh03G003150/CmoCh03G003570/CmoCh06G007880/CmoCh06G009630/CmoCh07G007980/CmoCh07G011090/CmoCh08G001720/CmoCh09G012480/CmoCh10G009790/CmoCh13G008750/CmoCh14G004220/CmoCh14G005390/CmoCh14G007350/CmoCh14G017980/CmoCh15G008100/CmoCh16G011130/CmoCh17G001960/CmoCh18G012510	20	up&down
ko00670	One carbon pool by folate	3/612	22/5449	1.21	0.456082	0.966489	CmoCh03G008930/CmoCh13G008750/CmoCh15G005940	3	up
ko04626	Plant-pathogen interaction	19/612	162/5449	1.04	0.457118	0.966489	CmoCh01G003790/CmoCh01G007370/CmoCh03G007110/CmoCh05G003160/CmoCh06G017360/CmoCh07G004250/CmoCh07G013630/CmoCh09G001730/CmoCh12G003530/CmoCh13G000170/CmoCh13G011470/CmoCh14G000290/CmoCh14G010850/CmoCh15G007330/CmoCh16G001050/CmoCh16G010310/CmoCh17G012410/CmoCh18G013350/CmoCh20G010450	19	up&down
ko00908	Zeatin biosynthesis	4/612	31/5449	1.15	0.465821	0.966489	CmoCh03G000390/CmoCh05G002730/CmoCh07G013860/CmoCh12G003920	4	up&down
ko00250	Alanine, aspartate and glutamate metabolism	9/612	75/5449	1.07	0.470109	0.966489	CmoCh01G003910/CmoCh02G007430/CmoCh04G006590/CmoCh04G028400/CmoCh14G017130/CmoCh16G005300/CmoCh18G007800/CmoCh20G001070/CmoCh20G003640	9	up&down
ko03410	Base excision repair	5/612	40/5449	1.11	0.472297	0.966489	CmoCh01G019760/CmoCh04G001740/CmoCh04G016460/CmoCh14G004220/CmoCh20G004050	5	up&down
ko00905	Brassinosteroid biosynthesis	2/612	14/5449	1.27	0.477425	0.966489	CmoCh04G029400/CmoCh11G005560	2	up
ko04141	Protein processing in endoplasmic reticulum	25/612	220/5449	1.01	0.507799	0.966489	CmoCh01G017970/CmoCh02G000570/CmoCh02G009230/CmoCh02G011860/CmoCh04G012150/CmoCh04G012170/CmoCh04G027600/CmoCh05G003160/CmoCh05G010910/CmoCh06G002650/CmoCh06G008000/CmoCh08G002050/CmoCh08G004470/CmoCh12G003530/CmoCh13G008620/CmoCh14G012350/CmoCh14G014450/CmoCh15G004100/CmoCh15G007840/CmoCh15G010620/CmoCh16G001050/CmoCh16G010310/CmoCh17G010190/CmoCh18G002220/CmoCh19G006150	25	up&down
ko00604	Glycosphingolipid biosynthesis - ganglio series	1/612	6/5449	1.48	0.510893	0.966489	CmoCh05G007870	1	up
ko00565	Ether lipid metabolism	4/612	33/5449	1.08	0.516362	0.966489	CmoCh05G003310/CmoCh06G007490/CmoCh06G011420/CmoCh08G012170	4	down
ko00130	Ubiquinone and other terpenoid-quinone biosynthesis	6/612	51/5449	1.05	0.517492	0.966489	CmoCh01G013720/CmoCh05G007700/CmoCh08G005650/CmoCh11G003950/CmoCh17G008870/CmoCh19G002210	6	up&down
ko00071	Fatty acid degradation	6/612	52/5449	1.03	0.537241	0.966489	CmoCh01G010340/CmoCh05G010180/CmoCh08G012070/CmoCh09G010960/CmoCh11G018110/CmoCh15G013480	6	up&down
ko04130	SNARE interactions in vesicular transport	5/612	44/5449	1.01	0.559889	0.966489	CmoCh02G001630/CmoCh03G002620/CmoCh06G005300/CmoCh07G008500/CmoCh07G012200	5	up&down
ko00010	Glycolysis / Gluconeogenesis	16/612	145/5449	0.98	0.570486	0.966489	CmoCh01G000890/CmoCh01G010340/CmoCh01G015120/CmoCh02G003650/CmoCh02G013840/CmoCh03G009020/CmoCh04G008890/CmoCh04G008900/CmoCh05G010180/CmoCh09G010960/CmoCh10G002000/CmoCh14G002730/CmoCh14G016070/CmoCh16G001840/CmoCh20G001020/CmoCh20G003060	16	up&down
ko00511	Other glycan degradation	3/612	26/5449	1.03	0.571808	0.966489	CmoCh04G020470/CmoCh04G023210/CmoCh05G007870	3	up&down
ko00460	Cyanoamino acid metabolism	7/612	63/5449	0.99	0.571916	0.966489	CmoCh02G003680/CmoCh03G008930/CmoCh03G009610/CmoCh10G003670/CmoCh10G010000/CmoCh10G010020/CmoCh13G010350	7	up&down
ko03018	RNA degradation	12/612	109/5449	0.98	0.575533	0.966489	CmoCh01G000890/CmoCh02G008560/CmoCh02G013510/CmoCh08G000540/CmoCh08G010210/CmoCh11G014920/CmoCh14G005390/CmoCh16G001840/CmoCh16G005240/CmoCh17G001290/CmoCh19G001600/Cucurbita_moschata_newGene_2223	12	up&down
ko00730	Thiamine metabolism	2/612	17/5449	1.05	0.584612	0.966489	CmoCh11G004130/CmoCh16G009100	2	up&down
ko00051	Fructose and mannose metabolism	7/612	65/5449	0.96	0.606194	0.966489	CmoCh01G000890/CmoCh01G019830/CmoCh02G003650/CmoCh12G010170/CmoCh14G002730/CmoCh15G014610/CmoCh20G001020	7	up&down
ko00052	Galactose metabolism	6/612	56/5449	0.95	0.612408	0.966489	CmoCh01G000890/CmoCh01G010890/CmoCh10G002000/CmoCh14G003190/CmoCh17G010010/CmoCh20G001020	6	up&down
ko00053	Ascorbate and aldarate metabolism	5/612	48/5449	0.93	0.639588	0.966489	CmoCh01G005830/CmoCh04G009830/CmoCh10G007130/CmoCh16G008610/CmoCh20G004910	5	up&down
ko03060	Protein export	5/612	48/5449	0.93	0.639588	0.966489	CmoCh02G009230/CmoCh10G011540/CmoCh12G004520/CmoCh17G008270/CmoCh18G002220	5	up&down
ko00563	Glycosylphosphatidylinositol(GPI)-anchor biosynthesis	2/612	19/5449	0.94	0.64655	0.966489	CmoCh07G013910/CmoCh15G003670	2	down
ko00480	Glutathione metabolism	9/612	87/5449	0.92	0.655034	0.966489	CmoCh01G005830/CmoCh03G003150/CmoCh04G006880/CmoCh07G007980/CmoCh10G001400/CmoCh14G007350/CmoCh15G012860/CmoCh17G010820/CmoCh20G004910	9	up&down
ko00660	C5-Branched dibasic acid metabolism	1/612	9/5449	0.99	0.658044	0.966489	CmoCh10G008780	1	up
ko00450	Selenocompound metabolism	3/612	30/5449	0.89	0.670978	0.966489	CmoCh02G013330/CmoCh14G017980/CmoCh17G001960	3	up&down
ko00220	Arginine biosynthesis	5/612	50/5449	0.89	0.675902	0.966489	CmoCh01G003910/CmoCh01G019820/CmoCh08G009310/CmoCh14G017130/CmoCh18G007800	5	up&down
ko00410	beta-Alanine metabolism	5/612	50/5449	0.89	0.675902	0.966489	CmoCh01G013800/CmoCh03G008880/CmoCh08G005030/CmoCh08G011220/CmoCh10G001400	5	up&down
ko00910	Nitrogen metabolism	5/612	50/5449	0.89	0.675902	0.966489	CmoCh01G003910/CmoCh03G009610/CmoCh12G001500/CmoCh14G017130/CmoCh15G007290	5	up&down
ko00603	Glycosphingolipid biosynthesis - globo series	1/612	10/5449	0.89	0.696514	0.966489	CmoCh05G007870	1	up
ko00350	Tyrosine metabolism	5/612	52/5449	0.86	0.709703	0.966489	CmoCh01G010340/CmoCh01G013720/CmoCh05G010180/CmoCh08G011220/CmoCh09G010960	5	up&down
ko00531	Glycosaminoglycan degradation	2/612	22/5449	0.81	0.725427	0.966489	CmoCh05G007870/CmoCh12G012090	2	up
ko04140	Regulation of autophagy	4/612	43/5449	0.83	0.727603	0.966489	CmoCh11G006660/CmoCh14G015900/CmoCh17G003890/CmoCh17G004510	4	down
ko04120	Ubiquitin mediated proteolysis	12/612	123/5449	0.87	0.741593	0.966489	CmoCh01G003640/CmoCh02G010180/CmoCh02G013070/CmoCh03G012590/CmoCh04G027800/CmoCh06G003470/CmoCh06G004260/CmoCh09G004920/CmoCh13G009370/CmoCh14G001790/CmoCh17G003760/CmoCh20G003750	12	up&down
ko00906	Carotenoid biosynthesis	4/612	44/5449	0.81	0.744375	0.966489	CmoCh02G012110/CmoCh02G018210/CmoCh11G013610/CmoCh16G005530	4	up&down
ko00290	Valine, leucine and isoleucine biosynthesis	2/612	24/5449	0.74	0.769323	0.966489	CmoCh03G011870/CmoCh10G008780	2	up&down
ko00300	Lysine biosynthesis	1/612	14/5449	0.64	0.811761	0.966489	CmoCh14G020470	1	up
ko00564	Glycerophospholipid metabolism	10/612	111/5449	0.8	0.814572	0.966489	CmoCh05G003310/CmoCh06G007490/CmoCh06G011420/CmoCh08G004740/CmoCh08G012170/CmoCh11G003170/CmoCh13G010270/CmoCh13G011330/CmoCh18G000550/CmoCh19G003050	10	up&down
ko04146	Peroxisome	9/612	102/5449	0.79	0.824387	0.966489	CmoCh02G013280/CmoCh04G004900/CmoCh04G023440/CmoCh05G013470/CmoCh10G009790/CmoCh14G012270/CmoCh15G013480/CmoCh18G005140/CmoCh20G001070	9	up&down
ko00620	Pyruvate metabolism	9/612	103/5449	0.78	0.832937	0.966489	CmoCh01G015120/CmoCh03G009020/CmoCh04G008890/CmoCh04G008900/CmoCh10G006950/CmoCh11G018110/CmoCh14G013270/CmoCh14G016070/CmoCh16G009340	9	up&down
ko00909	Sesquiterpenoid and triterpenoid biosynthesis	1/612	15/5449	0.59	0.832957	0.966489	CmoCh05G009500	1	down
ko01200	Carbon metabolism	32/612	329/5449	0.87	0.836888	0.966489	CmoCh01G000280/CmoCh01G000890/CmoCh01G015120/CmoCh02G003650/CmoCh02G013840/CmoCh02G016370/CmoCh02G016900/CmoCh03G008880/CmoCh03G008930/CmoCh03G009020/CmoCh03G009610/CmoCh03G011870/CmoCh04G008890/CmoCh04G008900/CmoCh05G010180/CmoCh08G006150/CmoCh09G000370/CmoCh10G006950/CmoCh11G018110/CmoCh14G002730/CmoCh14G006620/CmoCh14G006630/CmoCh14G012270/CmoCh14G013270/CmoCh14G016070/CmoCh16G001840/CmoCh18G0…	32	up&down
ko00600	Sphingolipid metabolism	2/612	29/5449	0.61	0.85323	0.966489	CmoCh03G005070/CmoCh04G020470	2	down
ko00790	Folate biosynthesis	1/612	17/5449	0.52	0.868467	0.966489	CmoCh04G000250	1	up
ko00770	Pantothenate and CoA biosynthesis	2/612	31/5449	0.57	0.878199	0.966489	CmoCh10G008780/CmoCh18G009510	2	up
ko00590	Arachidonic acid metabolism	1/612	18/5449	0.49	0.883287	0.966489	CmoCh15G012860	1	down
ko00561	Glycerolipid metabolism	5/612	67/5449	0.66	0.885961	0.966489	CmoCh03G014500/CmoCh05G012910/CmoCh08G004740/CmoCh08G006150/CmoCh13G011330	5	up&down
ko00562	Inositol phosphate metabolism	7/612	91/5449	0.68	0.899165	0.966489	CmoCh03G008330/CmoCh03G008880/CmoCh04G000490/CmoCh04G008580/CmoCh08G008010/CmoCh10G007130/CmoCh17G006330	7	up&down
ko00310	Lysine degradation	2/612	33/5449	0.54	0.899197	0.966489	CmoCh10G008250/CmoCh11G018110	2	up&down
ko00020	Citrate cycle (TCA cycle)	5/612	69/5449	0.65	0.900566	0.966489	CmoCh01G015120/CmoCh03G009020/CmoCh04G008890/CmoCh04G008900/CmoCh14G016070	5	down
ko00510	N-Glycan biosynthesis	3/612	46/5449	0.58	0.903476	0.966489	CmoCh09G000610/CmoCh13G002350/CmoCh18G007670	3	down
ko00195	Photosynthesis	7/612	92/5449	0.68	0.90515	0.966489	CmoCh04G005700/CmoCh04G018980/CmoCh04G024700/CmoCh08G003070/CmoCh09G000810/CmoCh13G004440/CmoCh16G004200	7	up
ko00760	Nicotinate and nicotinamide metabolism	1/612	21/5449	0.42	0.918469	0.966489	CmoCh04G028400	1	down
ko00030	Pentose phosphate pathway	4/612	64/5449	0.56	0.939664	0.966489	CmoCh01G000890/CmoCh02G003650/CmoCh02G016370/CmoCh14G002730	4	up&down
ko00380	Tryptophan metabolism	3/612	52/5449	0.51	0.942089	0.966489	CmoCh11G018110/CmoCh12G000220/CmoCh18G001750	3	up&down
ko00960	Tropane, piperidine and pyridine alkaloid biosynthesis	1/612	25/5449	0.36	0.949482	0.966489	CmoCh08G011220	1	up
ko00400	Phenylalanine, tyrosine and tryptophan biosynthesis	3/612	54/5449	0.49	0.951383	0.966489	CmoCh03G008600/CmoCh07G005550/CmoCh13G002930	3	down
ko04070	Phosphatidylinositol signaling system	5/612	80/5449	0.56	0.955158	0.966489	CmoCh04G000490/CmoCh04G028770/CmoCh08G008010/CmoCh13G011330/CmoCh17G006330	5	down
ko00196	Photosynthesis - antenna proteins	1/612	26/5449	0.34	0.955182	0.966489	CmoCh15G006090	1	up
ko00950	Isoquinoline alkaloid biosynthesis	1/612	27/5449	0.33	0.96024	0.966489	CmoCh08G011220	1	up
ko00900	Terpenoid backbone biosynthesis	3/612	57/5449	0.47	0.96275	0.966489	CmoCh11G004130/CmoCh11G018110/CmoCh20G007030	3	up&down
ko00920	Sulfur metabolism	2/612	44/5449	0.4	0.965764	0.966489	CmoCh14G017980/CmoCh17G001960	2	up&down
ko03022	Basal transcription factors	2/612	45/5449	0.4	0.96905	0.966489	CmoCh03G010130/CmoCh04G027130	2	up&down
ko01230	Biosynthesis of amino acids	22/612	279/5449	0.7	0.976519	0.966489	CmoCh01G000280/CmoCh01G000890/CmoCh01G003910/CmoCh01G019820/CmoCh02G003650/CmoCh02G013840/CmoCh02G016370/CmoCh03G001720/CmoCh03G008600/CmoCh03G008930/CmoCh03G011870/CmoCh07G005550/CmoCh08G009310/CmoCh10G008780/CmoCh11G009910/CmoCh13G002930/CmoCh14G002730/CmoCh14G017130/CmoCh14G020470/CmoCh16G001840/CmoCh18G007800/CmoCh20G003060	22	up&down
ko03040	Spliceosome	16/612	215/5449	0.66	0.976753	0.966489	CmoCh04G009020/CmoCh04G027600/CmoCh05G013680/CmoCh08G007450/CmoCh10G005930/CmoCh11G002110/CmoCh11G004170/CmoCh11G016750/CmoCh12G012430/CmoCh13G000160/CmoCh13G000480/CmoCh13G003150/CmoCh13G011210/CmoCh15G004100/CmoCh18G000060/CmoCh19G001600	16	up&down
ko00520	Amino sugar and nucleotide sugar metabolism	11/612	161/5449	0.61	0.978703	0.966489	CmoCh01G019840/CmoCh05G007870/CmoCh07G003850/CmoCh12G011950/CmoCh14G004900/CmoCh14G009470/CmoCh15G014610/CmoCh16G007830/CmoCh16G009170/CmoCh18G000220/CmoCh20G001020	11	up&down
ko04144	Endocytosis	16/612	218/5449	0.65	0.980268	0.966489	CmoCh01G012370/CmoCh02G001110/CmoCh02G002510/CmoCh04G014120/CmoCh04G027600/CmoCh05G001170/CmoCh05G003310/CmoCh06G007490/CmoCh06G017030/CmoCh08G012170/CmoCh09G008830/CmoCh10G007760/CmoCh15G004100/CmoCh17G007750/CmoCh18G004090/CmoCh20G004620	16	up&down
ko03020	RNA polymerase	2/612	50/5449	0.36	0.981412	0.966489	CmoCh15G008100/CmoCh18G012510	2	up
ko00100	Steroid biosynthesis	1/612	35/5449	0.25	0.984758	0.966489	CmoCh18G002100	1	up
ko00040	Pentose and glucuronate interconversions	11/612	173/5449	0.57	0.990142	0.966489	CmoCh02G009980/CmoCh06G011760/CmoCh10G007030/CmoCh11G006650/CmoCh12G010170/CmoCh14G016480/CmoCh15G008920/CmoCh15G010080/CmoCh17G006310/CmoCh17G009920/CmoCh20G001430	11	up&down
ko00860	Porphyrin and chlorophyll metabolism	2/612	62/5449	0.29	0.994698	0.966489	CmoCh10G006560/CmoCh12G005710	2	down
ko04712	Circadian rhythm - plant	1/612	46/5449	0.19	0.995932	0.966489	CmoCh15G010550	1	down
ko01210	2-Oxocarboxylic acid metabolism	2/612	69/5449	0.26	0.99749	0.966489	CmoCh10G008780/CmoCh18G007800	2	up
ko00061	Fatty acid biosynthesis	1/612	57/5449	0.16	0.998917	0.966489	CmoCh15G013480	1	down
ko00190	Oxidative phosphorylation	9/612	179/5449	0.45	0.998939	0.966489	CmoCh03G004530/CmoCh06G004740/CmoCh08G008120/CmoCh10G007270/CmoCh11G011110/CmoCh12G010430/CmoCh13G004440/CmoCh16G003920/CmoCh17G005340	9	up&down
ko01212	Fatty acid metabolism	3/612	94/5449	0.28	0.998941	0.966489	CmoCh08G012070/CmoCh11G018110/CmoCh15G013480	3	up&down
ko03015	mRNA surveillance pathway	5/612	137/5449	0.32	0.999667	0.966489	CmoCh03G012000/CmoCh05G006050/CmoCh06G011440/CmoCh10G009260/CmoCh17G007290	5	up&down
ko00270	Cysteine and methionine metabolism	3/612	115/5449	0.23	0.999879	0.966489	CmoCh05G010330/CmoCh10G001400/CmoCh17G001990	3	up&down
ko03050	Proteasome	1/612	77/5449	0.12	0.999903	0.966489	CmoCh18G001230	1	up
ko03013	RNA transport	7/612	198/5449	0.31	0.999982	0.966489	CmoCh01G011800/CmoCh03G010120/CmoCh04G030370/CmoCh06G011440/CmoCh09G005020/CmoCh11G005540/CmoCh11G005550	7	up
