# Supplementary material for: Transcriptomic analysis and physiological characteristics of exogenous naphthylacetic acid application to regulate the healing process of oriental melon grafted onto squash
Source: PeerJ. 2022 Sep 15;10:e13980. doi: 10.7717/peerj.13980 (PMC9482769; doi:10.7717/peerj.13980)
Supplement: Supplemental Information 15 [file peerj-10-13980-s015.xlsx]

## Sheet: Sheet1
	GENE NAME	IL stage(log2FC)	CA stage(log2FC)	VB stage(log2FC)
Auxin efflux carrier	MELO3C019102.2	1.20304	-0.118097	-0.044656
	CmoCh11G003520	2.22038	-0.0149144	0.464583
	CmoCh04G021920	2.33859	-0.705102	0.210326
	CmoCh11G003180	1.09262	-1.33478	0.631417
	CmoCh07G011410	0.720786	-0.372072	2.29331
ARF	MELO3C003768.2	1.08591	-1.71661	-0.637002
	MELO3C033303.2	0.311017	1.05041	0.267508
	MELO3C025777.2	1.13888	-0.274157	-0.371282
	MELO3C019801.2	1.2936	0.181353	-0.255527
	CmoCh08G001220	0.298907	-1.33349	1.18482
AUX/IAA	MELO3C007691.2	1.15101	-0.173645	-0.515258
	MELO3C025308.2	0.66951	0.575357	1.37348
	MELO3C024699.2	1.14861	0.490863	-0.262631
	MELO3C004382.2	1.40003	0.320194	0.459091
	CmoCh07G006010	0.276254	-1.23676	1.25308
	CmoCh10G006330	1.68562	0.823478	0.400522
	CmoCh09G004620	1.16466	-0.222097	0.781383
	CmoCh14G018090	0.4208	-1.42269	1.09441
GH3	MELO3C016616.2	1.16586	0.187486	1.39775
	MELO3C008672.2	1.60769	0.952393	-0.912838
	MELO3C017825.2	1.2682	-0.416821	-1.74745
	MELO3C007597.2	-0.926215	-0.0231244	1.04881
	CmoCh03G009710	0.655629	-1.15392	1.38319
	CmoCh16G003520	-0.951995	-2.86968	1.06419
Type-B ARR	MELO3C012031.2	1.4111	-0.0174656	0.435654
	CmoCh15G008650	1.8717	-1.32923	1.60216
	CmoCh14G016360	-0.48594	1.14773	-0.852067
	CmoCh05G000700	1.03713	-0.210125	0.0976638
CRE1	CmoCh15G009250	1.13117	-0.705716	0.400567
AHP	MELO3C024439.2	3.60982	-1.22215	2.57699
	MELO3C015359.2	-1.27788	-0.00595182	1.67953
	CmoCh14G016980	-0.419066	1.05438	0.0608627
	CmoCh17G002800	0.117933	1.24411	0.0489091
	CmoCh14G013260	1.34399	2.06141	1.09335
	CmoCh06G014530	-0.346844	1.14467	-0.0721583
