# Supplementary material for: Transcriptomic analysis and physiological characteristics of exogenous naphthylacetic acid application to regulate the healing process of oriental melon grafted onto squash
Source: PeerJ. 2022 Sep 15;10:e13980. doi: 10.7717/peerj.13980 (PMC9482769; doi:10.7717/peerj.13980)
Supplement: Supplemental Information 16 [file peerj-10-13980-s016.xlsx]

## Sheet: Sheet1
	GENE NAME	IL stage(log2FC)	CA stage(log2FC)	VB stage(log2FC)
POD	MELO3C014252.2	1.66871	-1.11853	-0.127974
	MELO3C007618.2	-2.151	1.33254	-0.141082
	MELO3C019239.2	1.38859	1.82802	-0.46816
	MELO3C007868.2	0.840075	-0.119923	1.77403
	MELO3C016951.2	0.49832	0.364221	1.59035
	MELO3C009924.2	1.07217	-0.172703	-0.0899926
	MELO3C019994.2	1.8018	-0.512998	1.13536
	MELO3C005667.2	1.39024	0.0184384	-0.236679
	MELO3C002457.2	5.04721	-0.799276	-0.848141
	MELO3C026870.2	2.73694	-0.0493946	0.95477
	CmoCh01G016130	2.45285	-0.60333	0.871409
	CmoCh20G003420	1.00534	-1.81127	-0.352247
	CmoCh11G019110	0.331673	-0.984906	1.50112
	CmoCh08G012530	1.13409	1.4107	0.351507
	CmoCh07G004030	2.28582	-2.16432	0.554148
	CmoCh04G030950	1.60528	-1.02697	1.31528
APX	MELO3C020719.2	1.15235	0.184655	0.506618
	CmoCh01G005830	0.336665	-0.670397	1.37474
Prx	MELO3C024691.2	1.20059	-0.349333	0.469587
	MELO3C009429.2	1.67849	-0.0180714	0.497059
	MELO3C009519.2	0.425577	-0.093993	1.0079
	CmoCh09G011880	0.932829	-0.829239	1.07027
SOD	MELO3C020487.2	0.518513	0.156902	1.37703
	CmoCh04G023440	1.03268	-0.222568	1.00683
PAL	MELO3C014228.2	1.38219	-0.733409	-1.41729
	MELO3C014222.2	1.34741	-0.473572	2.63253
	MELO3C017809.2	2.00836	-0.15745	-1.4512
