# Supplementary material for: Transcriptomic analysis and physiological characteristics of exogenous naphthylacetic acid application to regulate the healing process of oriental melon grafted onto squash
Source: PeerJ. 2022 Sep 15;10:e13980. doi: 10.7717/peerj.13980 (PMC9482769; doi:10.7717/peerj.13980)
Supplement: Supplemental Information 17 [file peerj-10-13980-s017.xlsx]

## Sheet: Sheet1
	GENE NAME	IL stage(log2FC)	CA stage(log2FC)	VB stage(log2FC)
Expansin	MELO3C017181.2	3.6065	-0.29542	1.29645
	MELO3C025095.2	-0.189994	0.257417	1.05261
	CmoCh11G001730	0.100104	-1.07443	1.66467
	CmoCh01G005150	2.28285	-0.853079	1.69831
	CmoCh03G004350	1.5575	-1.27773	1.72694
	CmoCh10G002140	0.634564	-1.42737	1.77838
Tubulin	CmoCh03G009120	0.621139	-1.42954	1.24634
	CmoCh07G010840	0.376001	-1.37281	1.00966
	CmoCh14G000910	0.463357	-1.07141	1.16702
	CmoCh07G006190	0.868125	-1.59047	1.51783
	CmoCh16G003240	0.599174	-0.976701	1.15245
Cellulose synthase	MELO3C016270.2	-1.04252	-0.0811538	1.22244
	CmoCh16G005790	1.30694	-0.537144	1.48167
	CmoCh09G010200	0.112842	-0.0202596	1.09263
	CmoCh14G009470	-0.268746	-1.79833	1.12618
Cinnamoyl-coA reductase (CCR)	MELO3C017061.2	1.03349	0.176796	1.30337
transcription factor MYB	MELO3C019621.2	0.610155	0.324177	1.01499
	MELO3C022963.2	0.512751	0.179795	1.16067
	MELO3C012590.2	-0.722564	0.553907	1.7349
	CmoCh04G020640	0.539485	-0.850329	1.06543
	MELO3C023204.2	1.24665	0.368807	2.20716
	MELO3C014085.2	0.570695	0.148787	1.4428
	MELO3C013364.2	2.28703	-0.513696	1.59326
	CmoCh04G028930	-0.234882	-1.62102	1.37094
	CmoCh01G016480	0.102229	-1.42381	1.60766
	MELO3C010833.2	-0.209881	0.733537	1.47423
	MELO3C010893.2	-1.18699	1.34702	1.59653
	CmoCh04G017460	0.289945	-0.691212	1.9645
	CmoCh06G000610	1.02956	-1.23296	1.18728
	CmoCh04G020640	0.539485	-0.850329	1.06543
	CmoCh01G000450	0.476143	0.879374	1.08341
	CmoCh13G010630	0.492179	-0.631901	1.19997
Aspartic proteinase
	MELO3C020328.2	2.21827	-0.80795	1.44238
	CmoCh15G014930	1.07397	-1.37503	1.17983
	CmoCh07G004000	0.751756	-1.18497	1.36027
	CmoCh04G013980	1.38498	-1.69831	2.33098
	CmoCh18G008610	1.8263	-0.245642	2.19055
Cysteine proteinase	MELO3C027001.2	0.337153	-0.392915	1.7087
	CmoCh03G010910	0.285697	1.01868	1.21482
exonuclease	CmoCh13G010360	0.35553	-1.12786	1.90763
ribonuclease	MELO3C023673.2	0.466064	0.676205	1.07211
	CmoCh03G010620	0.0470171	-0.08854	1.15945
Metacaspase	CmoCh11G014810	1.2979	0.589357	1.65975
