# Supplementary material for: Transcriptomic analysis and physiological characteristics of exogenous naphthylacetic acid application to regulate the healing process of oriental melon grafted onto squash
Source: PeerJ. 2022 Sep 15;10:e13980. doi: 10.7717/peerj.13980 (PMC9482769; doi:10.7717/peerj.13980)
Supplement: Supplemental Information 18 [file peerj-10-13980-s018.xlsx]

## Sheet: Sheet1
CmoCh07G009530					AVERAGE	STDEV	P<0.05
IL stage	CK	0.2088	0.3299	0.134	0.224233	0.088421	a
	NAA	0.1956	0.3087	0.1521	0.2188	0.0723025	a
CA stage	CK	0.0689	0.06207	0.0902	0.0737233	0.0131232	a
	NAA	0.0231	0.0215	0.0354	0.0266667	0.00680255	b
VB stage	CK	0.5625	0.5034	0.5471	0.537667	0.0274218	a
	NAA	0.3214	0.3352	0.3004	0.319	0.0156737	b
CmoCh08G005650					AVERAGE	STDEV
IL stage	CK	0.0196	0.0256	0.0286	0.0246	0.00409878	a
	NAA	0.0187	0.0268	0.0295	0.025	0.00502713	a
CA stage	CK	0.0023	0.0035	0.005	0.0036	0.00120996	a
	NAA	0.0025	0.0029	0.0064	0.00393333	0.00191903	a
VB stage	CK	0.0254	0.0194	0.0256	0.0234667	0.0031513	a
	NAA	0.0112	0.0114	0.017	0.0132	0.00294483	b
CmoCh08G003030					AVERAGE	STDEV
IL stage	CK	0.0713	0.06	0.0733	0.0682	0.00641436	a
	NAA	0.0698	0.0632	0.0754	0.0694667	0.00546211	a
CA stage	CK	0.0237	0.0354	0.0181	0.0257333	0.00789548	a
	NAA	0.0212	0.0347	0.0197	0.0252	0.00738918	a
VB stage	CK	0.0215	0.0296	0.0265	0.0258667	0.0036555	a
	NAA	0.0254	0.0324	0.0221	0.0266333	0.00470432	a
CmoCh20G005830					AVERAGE	STDEV
IL stage	CK	0.0096	0.0059	0.0045	0.00666667	0.00235683	a
	NAA	0.0081	0.0042	0.0065	0.00626667	0.00175347	a
CA stage	CK	0.0015	0.0009	0.0006	0.001	0.000409878	a
	NAA	0.0014	0.0012	0.0008	0.00113333	0.000273252	a
VB stage	CK	0.0032	0.0051	0.008	0.00543333	0.0021621	a
	NAA	0.0029	0.0049	0.0012	0.003	0.0016565	a
MELO3C034560.2					AVERAGE	STDEV
IL stage	CK	0.0107	0.0105	0.0095	0.0102333	0.000575036	a
	NAA	0.0212	0.0122	0.0131	0.0155	0.00443351	a
CA stage	CK	0.0188	0.0198	0.0249	0.0211667	0.0029262	a
	NAA	0.0216	0.0219	0.0265	0.0233333	0.00245656	a
VB stage	CK	0.0533	0.0501	0.0409	0.0481	0.00575778	a
	NAA	0.0598	0.0497	0.0423	0.0506	0.00785723	a
MELO3C026019.2					AVERAGE	STDEV
IL stage	CK	0.015	0.0178	0.0157	0.0161667	0.00130333	a
	NAA	0.0069	0.0074	0.0071	0.00713333	0.000225093	b
CA stage	CK	0.0037	0.0024	0.0026	0.0029	0.000626099	b
	NAA	0.0057	0.0064	0.0068	0.0063	0.000497996	a
VB stage	CK	0.0067	0.0068	0.0076	0.00703333	0.00044121	a
	NAA	0.0029	0.0028	0.0032	0.00296667	0.00018619	b
MELO3C010317.2					AVERAGE	STDEV
IL stage	CK	0.0196	0.0256	0.0286	0.0246	0.00409878	a
	NAA	0.0292	0.0311	0.0323	0.0308667	0.00139809	a
CA stage	CK	0.0023	0.0035	0.005	0.0036	0.00120996	b
	NAA	0.0098	0.0132	0.0195	0.0141667	0.00440212	a
VB stage	CK	0.0254	0.0194	0.0256	0.0234667	0.0031513	a
	NAA	0.0211	0.0223	0.0298	0.0244	0.00421711	a
MELO3C015359.2					AVERAGE	STDEV
IL stage	CK	1.0026	1.0755	0.9298	1.00263	0.065159	a
	NAA	0.9956	1.2356	0.8976	1.04293	0.155541	a
CA stage	CK	17.897	15.4506	16.2016	16.5164	1.12091	a
	NAA	17.5623	16.2565	18.3296	17.3828	0.937486	a
VB stage	CK	1.3558	1.2198	1.0918	1.22247	0.118082	b
	NAA	4.6923	3.9561	3.8923	4.18023	0.39767	a
MELO3C014091.2					AVERAGE	STDEV
IL stage	CK	0.0148	0.0093	0.0098	0.0113	0.00272029	b
	NAA	0.06951	0.05942	0.0612	0.0633767	0.00481709	a
CA stage	CK	0.0163	0.0713	0.0209	0.0361667	0.0272918	a
	NAA	0.0412	0.0354	0.0291	0.0352333	0.00541282	a
VB stage	CK	0.2717	0.1961	0.2146	0.227467	0.0352477	a
	NAA	0.3251	0.2891	0.1945	0.269567	0.0603341	a
MELO3C004382.2					AVERAGE	STDEV
IL stage	CK	1.2227	0.8367	0.8566	0.972	0.194395	b
	NAA	3.6512	3.1563	3.2942	3.36723	0.228442	a
CA stage	CK	2.4851	2.1663	2.9638	2.5384	0.359035	a
	NAA	2.8642	2.1965	2.3547	2.4718	0.312077	a
VB stage	CK	4.7169	3.7875	3.8519	4.11877	0.464206	a
	NAA	4.3612	4.9856	4.2256	4.52413	0.362558	a
