# Supplementary material for: Transcriptomic analysis and physiological characteristics of exogenous naphthylacetic acid application to regulate the healing process of oriental melon grafted onto squash
Source: PeerJ. 2022 Sep 15;10:e13980. doi: 10.7717/peerj.13980 (PMC9482769; doi:10.7717/peerj.13980)
Supplement: Supplemental Information 19 [file peerj-10-13980-s019.xlsx]

## Sheet: Sheet1
IAA	ng/g.FW			AVERAGE	STDEV	P<0.05
CK-IL	49.5513	46.4264	49.7879	48.5885	1.87617	a
CK-CA	33.7508	33.7438	32.3135	33.2694	0.827827	d
CK-VB	43.4106	45.972	43.1577	44.1801	1.55697	b
NAA-IL	43.8097	41.0594	41.2022	42.0238	1.54833	bc
NAA-CA	43.3111	41.2749	39.7879	41.458	1.76874	c
NAA-VB	48.5238	49.8106	49.4264	49.2536	0.66056	a
ZR	ng/g.FW			AVERAGE	STDEV
CK-IL	6.39045	6.51149	5.63899	6.18031	0.472688	c
CK-CA	7.61365	7.0631	7.92958	7.53544	0.438504	b
CK-VB	8.33647	8.18149	7.6375	8.05182	0.367084	b
NAA-IL	5.0228	5.18237	5.65665	5.28728	0.329689	d
NAA-CA	9.32994	9.71709	10.3767	9.80791	0.529256	a
NAA-VB	10.152	9.27176	9.80869	9.74415	0.443651	a
GA	ng/g.FW			AVERAGE	STDEV
CK-IL	5.75284	6.01012	5.04522	5.60273	0.499655	e
CK-CA	5.33189	5.99629	6.22133	5.84984	0.462454	de
CK-VB	7.16429	7.75284	7.70009	7.53907	0.325641	b
NAA-IL	6.74349	7.27588	6.10777	6.70905	0.584814	c
NAA-CA	5.88684	6.82157	6.80588	6.50477	0.535195	cd
NAA-VB	9.41115	9.41115	9.35387	9.39206	0.0330747	a
