# Supplementary material for: Transcriptomic analysis and physiological characteristics of exogenous naphthylacetic acid application to regulate the healing process of oriental melon grafted onto squash
Source: PeerJ. 2022 Sep 15;10:e13980. doi: 10.7717/peerj.13980 (PMC9482769; doi:10.7717/peerj.13980)
Supplement: Supplemental Information 20 [file peerj-10-13980-s020.xlsx]

## Sheet: Sheet1
SOD	（U. g-1.h-1.FW)
CK				AVERAGE	STDEV	P<0.05			NAA			AVERAGE	STDEV	P<0.05
CK-IL	179.232	185.313	181.876	182.14	3.04939	d		NAA-IL	337.66	365.71	353.12	267.34	14.0494	b
CK-CA	175.213	366.053	272.454	271.24	95.4259	bc		NAA-CA	506.435	469.353	443.528	473.105	31.6209	a
CK-VB	213.752	228.849	221.231	221.277	7.54895	cd		NAA-VB	322.879	331.884	380.753	345.172	31.1414	b
POD	（U. g-1.h-1.FW)
CK				AVERAGE	STDEV				NAA			AVERAGE	STDEV
CK-IL	785	1135	1025	981.667	178.979	b		NAA-IL	765	520	620	635	123.187	b
CK-CA	585	1230	1190	1001.67	361.398	b		NAA-CA	3240	3720	4195	3718.33	477.502	a
CK-VB	3905	2835	2810	3183.33	625.107	a		NAA-VB	3530	3930	3610	3690	211.66	a
PAL	（U. g-1.h-1.FW)
CK				AVERAGE	STDEV				NAA			AVERAGE	STDEV
CK-IL	18.45	19.13	23.55	20.3767	2.76914	e		NAA-IL	187.81	192.34	186.33	188.827	3.13133	c
CK-CA	103.34	106.56	110.98	106.96	3.83567	d		NAA-CA	120.43	110.71	112.56	114.567	5.16136	d
CK-VB	268.56	277.89	279.62	275.357	5.94931	b		NAA-VB	311.61	301.64	306.76	306.67	4.98561	a
PPO	（U. g-1.h-1.FW)
CK				AVERAGE	STDEV				NAA			AVERAGE	STDEV
CK-IL	12.375	8.175	15.6	8.875	3.72315	c		NAA-IL	23.775	15.525	17.475	18.925	4.3119	b
CK-CA	29.25	30.9	30.6	30.25	0.87892	a		NAA-CA	28.95	29.55	26.625	28.375	1.54495	ab
CK-VB	40.425	39.825	20.25	33.5	11.4788	a		NAA-VB	29.25	37.575	26.4	31.075	5.80673	a
